# Supplementary material for: Synthesis and evaluation of potent (iso)ellipticine-based inhibitors of MYLK4 accessed via expeditious synthesis from isoquinolin-5-ol
Source: Royal Society of Chemistry journal article supplement (doi:10.1039/d3ra06600b), 2023-01-01

## Support Information

### Synthesis and Evaluation of Potent (Iso)ellipticine-based Inhibitors of MYLK4 Accessed via Expeditious Synthesis from Isoquinolin-5-ol

Szu Lee, Min-Wu Chao, Yi-Wen Wu, Chia-Min Hsu, Tony Eight Lin, Kai-Cheng  
Hsu, Shiow-Lin Pan, Hsueh-Yun Lee\*

#### Contents:

|                                                                                                                |       |
|----------------------------------------------------------------------------------------------------------------|-------|
| <b>Figure S1.</b> Expression level of MYLK4 in acute myeloid leukemia.....                                     | SI-2  |
| HPLC purity data for compounds <b>1-4</b> , <b>6</b> , <b>8</b> , <b>9</b> , and <b>13-15</b> .....            | SI-3  |
| <sup>1</sup> H NMR Spectra for compounds <b>1-4</b> , <b>6</b> , <b>8</b> , <b>9</b> , and <b>13-15</b> .....  | SI-13 |
| <sup>13</sup> C NMR Spectra for compounds <b>1-4</b> , <b>6</b> , <b>8</b> , <b>9</b> , and <b>13-15</b> ..... | SI-23 |
| HMBC Spectra for compound <b>8</b> .....                                                                       | SI-33 |
| NOESY Spectra for compound <b>8</b> .....                                                                      | SI-35 |

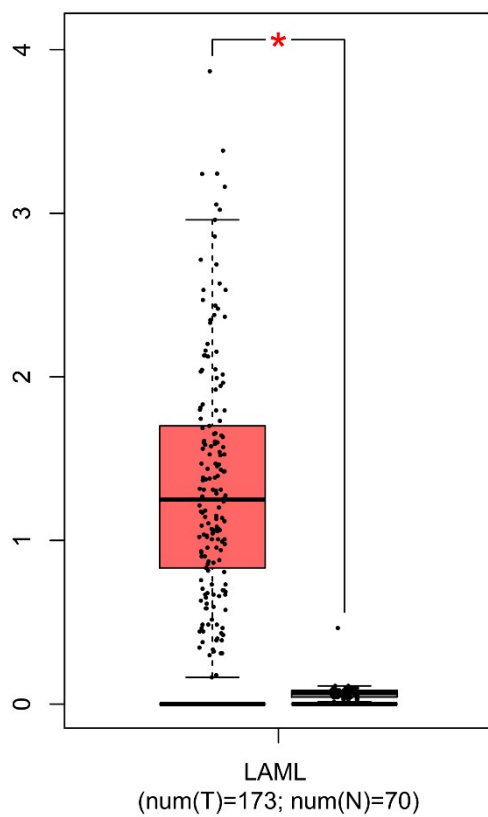

**Figure S1.** Expression level of MYLK4 in acute myeloid leukemia.

## HPLC spectrum of compound 1

## ==== Shimadzu LabSolutions Analysis Report ====

Sample Name : DHT-05107 (Ag 10mM ABC + NH4OH pH 8.5 60m) Data Filename  
 Method Filename : 61-HPLC Buffer-60min.lcm Batch Filename : 20210719-LC-60m.lcb  
 Vial # : 1-35 Injection Volume : 20 uL  
 Date Acquired : 2021/7/19 下午 06:18:28 Acquired by : System Administrator  
 Date Processed : 2021/7/19 下午 07:18:30 Processed by : System Administrator

## &lt;Method&gt;

## &lt;&lt;Data Acquisition&gt;&gt;

AD1 Name : SPD-20A LC Stop Time : 60.00 min  
 AD1 Sampling Frequency : 2 Hz

## &lt;&lt;Autosampler&gt;&gt;

Autosampler Model : LC-2030 Autosampler  
 Enable Autosampler : Use

## &lt;&lt;Oven&gt;&gt;

Oven Model : LC-2030 Oven Enable Oven : Not Used

## &lt;&lt;Column Information&gt;&gt;

Column Name : ZORBAX Eclipse XDB-C18 Column ID : ZORBAX Eclipse XDB-C18  
 Column Length : 150 mm Inner Diameter : 4.6 mm

## &lt;&lt;Mobile Phase Name&gt;&gt;

Mobile Phase A : Acetonitrile Mobile Phase B : Water  
 Mobile Phase C : Methanol Mobile Phase D : Buffer

## &lt;&lt;Pump&gt;&gt;

Mode : Low pressure gradient Pump A : LC-2030 Pump  
 Flow : 0.5000 mL/min B Conc. : 0.0 %  
 C Conc. : 0.0 % D Conc. : 90.0 %

## &lt;&lt;LC Time Program&gt;&gt;

| Time  | Module     | Command         | Value | Comment |
|-------|------------|-----------------|-------|---------|
| 0.01  | Pumps      | Solvent D Conc. | 90    |         |
| 45.00 | Pumps      | Solvent D Conc. | 10    |         |
| 50.00 | Pumps      | Solvent D Conc. | 90    |         |
| 60.00 | Pumps      | Solvent D Conc. | 90    |         |
| 60.00 | Controller | Stop            |       |         |

## &lt;Chromatogram&gt;

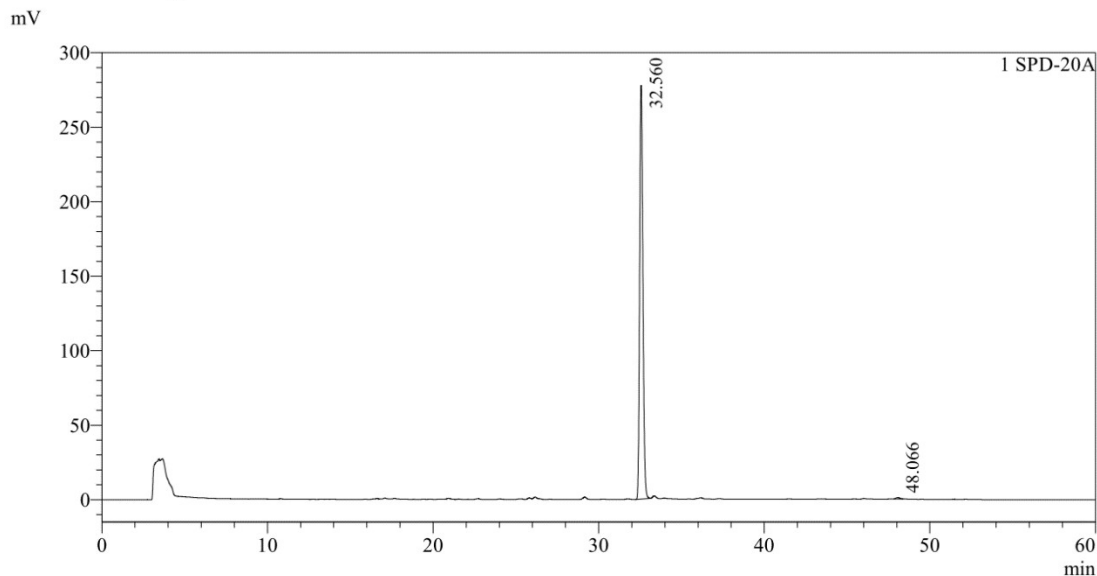

## &lt;Peak Table&gt;

| SPD-20A |           |         |        |             |         |                |
|---------|-----------|---------|--------|-------------|---------|----------------|
| Peak#   | Ret. Time | Area    | Height | Area/Height | Area%   | Tailing Factor |
| 1       | 32.560    | 3802676 | 277699 | 13.694      | 99.650  | 1.216          |
| 2       | 48.066    | 13344   | 884    | 15.099      | 0.350   | 1.185          |
| Total   |           | 3816020 | 278583 |             | 100.000 |                |

## HPLC spectrum of compound 2

## ==== Shimadzu LabSolutions Analysis Report ====

Sample Name : DHT-05538 (Ag 10mM ABC + NH4OH pH 8.5 60m) Data Filename  
 Method Filename : 61-HPLC Buffer-60min.lcm Batch Filename : 20210719-LC-60m.lcb  
 Vial # : 1-34 Injection Volume : 20 uL  
 Date Acquired : 2021/7/19 下午 05:18:02 Acquired by : System Administrator  
 Date Processed : 2021/7/19 下午 06:18:06 Processed by : System Administrator

## &lt;Method&gt;

## &lt;&lt;Data Acquisition&gt;&gt;

AD1 Name : SPD-20A LC Stop Time : 60.00 min  
 AD1 Sampling Frequency : 2 Hz

## &lt;&lt;Autosampler&gt;&gt;

Autosampler Model : LC-2030 Autosampler  
 Enable Autosampler : Use

## &lt;&lt;Oven&gt;&gt;

Oven Model : LC-2030 Oven Enable Oven : Not Used

## &lt;&lt;Column Information&gt;&gt;

Column Name : ZORBAX Eclipse XDB-C18 Column ID : ZORBAX Eclipse XDB-C18  
 Column Length : 150 mm Inner Diameter : 4.6 mm

## &lt;&lt;Mobile Phase Name&gt;&gt;

Mobile Phase A : Acetonitrile Mobile Phase B : Water  
 Mobile Phase C : Methanol Mobile Phase D : Buffer

## &lt;&lt;Pump&gt;&gt;

Mode : Low pressure gradient Pump A : LC-2030 Pump  
 Flow : 0.5000 mL/min B Conc. : 0.0 %  
 C Conc. : 0.0 % D Conc. : 90.0 %

## &lt;&lt;LC Time Program&gt;&gt;

| Time  | Module     | Command         | Value | Comment |
|-------|------------|-----------------|-------|---------|
| 0.01  | Pumps      | Solvent D Conc. | 90    |         |
| 45.00 | Pumps      | Solvent D Conc. | 10    |         |
| 50.00 | Pumps      | Solvent D Conc. | 90    |         |
| 60.00 | Pumps      | Solvent D Conc. | 90    |         |
| 60.00 | Controller | Stop            |       |         |

## &lt;Chromatogram&gt;

mV

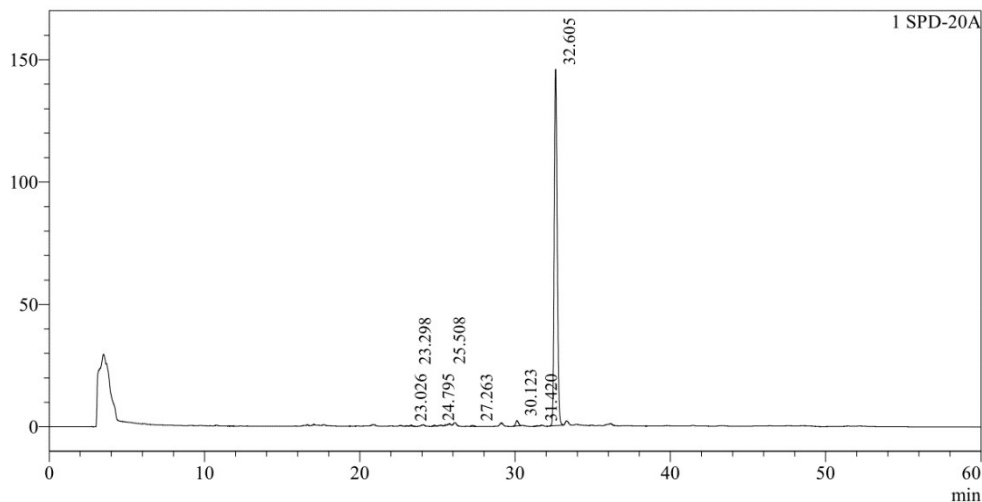

## &lt;Peak Table&gt;

SPD-20A

| Peak# | Ret. Time | Area    | Height | Area/Height | Area%   | Tailing Factor |
|-------|-----------|---------|--------|-------------|---------|----------------|
| 1     | 23.026    | 1106    | 148    | 7.493       | 0.056   | 0.977          |
| 2     | 23.298    | 3497    | 376    | 9.287       | 0.177   | 1.256          |
| 3     | 24.795    | 3460    | 360    | 9.603       | 0.175   | 1.013          |
| 4     | 25.508    | 2118    | 298    | 7.099       | 0.107   | 1.073          |
| 5     | 27.263    | 3809    | 383    | 9.956       | 0.192   | 1.153          |
| 6     | 30.123    | 26613   | 2180   | 12.209      | 1.345   | 1.114          |
| 7     | 31.420    | 1538    | 155    | 9.934       | 0.078   | 0.907          |
| 8     | 32.605    | 1937211 | 145497 | 13.314      | 97.871  | 1.155          |
| Total |           | 1979352 | 149397 |             | 100.000 |                |

## HPLC spectrum of compound 3

## ==== Shimadzu LabSolutions Analysis Report ====

Sample Name : DHT-05540 (10mM NH<sub>4</sub>OAc+ 0.1 HCOOH 60m) Data Filename : 2  
 Method Filename : 61-HPLC Buffer-60min.lcm Batch Filename : 20210705-LC (10mM NH<sub>4</sub>OAc)  
 Vial # : 1-37 Injection Volume : 20 uL  
 Date Acquired : 2021/7/5 下午 08:02:31 Acquired by : System Administrator  
 Date Processed : 2021/7/5 下午 09:02:32 Processed by : System Administrator

## &lt;Method&gt;

## &lt;&lt;Data Acquisition&gt;&gt;

AD1 Name : SPD-20A LC Stop Time : 60.00 min  
 AD1 Sampling Frequency : 2 Hz

## &lt;&lt;Autosampler&gt;&gt;

Autosampler Model : LC-2030 Autosampler  
 Enable Autosampler : Use

## &lt;&lt;Oven&gt;&gt;

Oven Model : LC-2030 Oven Enable Oven : Not Used

## &lt;&lt;Column Information&gt;&gt;

Column Name : ZORBAX Eclipse XDB-C18 Column ID : ZORBAX Eclipse XDB-C18  
 Column Length : 150 mm Inner Diameter : 4.6 mm

## &lt;&lt;Mobile Phase Name&gt;&gt;

Mobile Phase A : Acetonitrile Mobile Phase B : Water  
 Mobile Phase C : Methanol Mobile Phase D : Buffer

## &lt;&lt;Pump&gt;&gt;

Mode : Low pressure gradient Pump A : LC-2030 Pump  
 Flow : 0.5000 mL/min B Conc. : 0.0 %  
 C Conc. : 0.0 % D Conc. : 90.0 %

## &lt;&lt;LC Time Program&gt;&gt;

| Time  | Module     | Command         | Value | Comment |
|-------|------------|-----------------|-------|---------|
| 0.01  | Pumps      | Solvent D Conc. | 90    |         |
| 45.00 | Pumps      | Solvent D Conc. | 10    |         |
| 50.00 | Pumps      | Solvent D Conc. | 90    |         |
| 60.00 | Pumps      | Solvent D Conc. | 90    |         |
| 60.00 | Controller | Stop            |       |         |

## &lt;Chromatogram&gt;

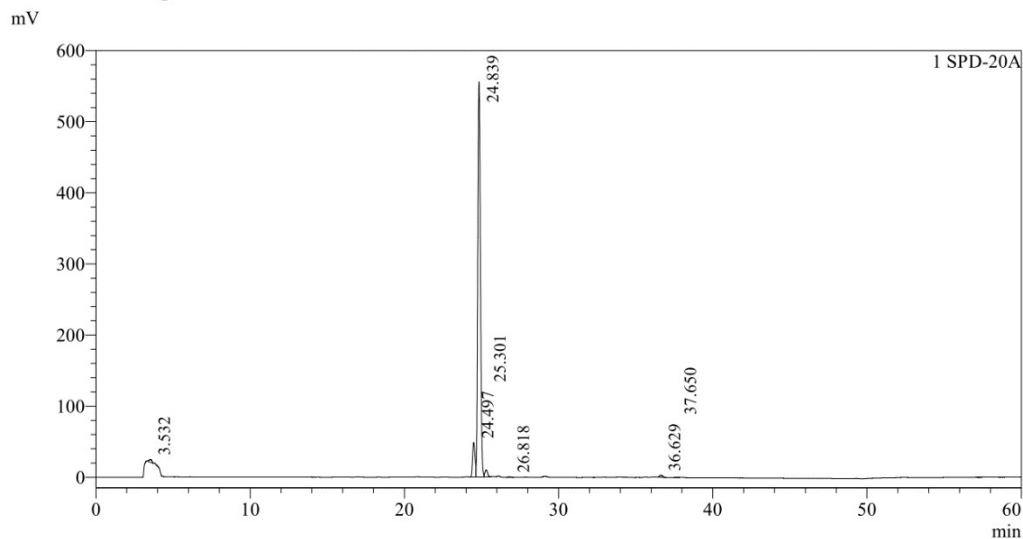

## &lt;Peak Table&gt;

| SPD-20A Peak# | Ret. Time | Area    | Height | Area/Height | Area%   | Tailing Factor |
|---------------|-----------|---------|--------|-------------|---------|----------------|
| 1             | 3.532     | 51152   | 3954   | 12.936      | 0.690   | 0.897          |
| 2             | 24.497    | 542388  | 48420  | 11.202      | 7.317   | --             |
| 3             | 24.839    | 6647504 | 556318 | 11.949      | 89.679  | 1.156          |
| 4             | 25.301    | 120021  | 10069  | 11.919      | 1.619   | --             |
| 5             | 26.818    | 6398    | 537    | 11.908      | 0.086   | 1.209          |
| 6             | 36.629    | 40518   | 2982   | 13.588      | 0.547   | 1.190          |
| 7             | 37.650    | 4601    | 428    | 10.756      | 0.062   | 1.049          |
| Total         |           | 7412582 | 622709 |             | 100.000 |                |

## HPLC spectrum of compound 4

## ==== Shimadzu LabSolutions Analysis Report =====

Sample Name : DHT-05392 (10mM NH<sub>4</sub>OAc+ 0.1 HCOOH 60m) Data Filename : 2  
 Method Filename : 61-HPLC Buffer-60min.lcm Batch Filename : 20210705-LC (10mM NH<sub>4</sub>OAc)  
 Vial # : 1-34 Injection Volume : 20 uL  
 Date Acquired : 2021/7/5 下午 11:03:38 Acquired by : System Administrator  
 Date Processed : 2021/7/6 上午 12:03:39 Processed by : System Administrator

## &lt;&lt;Method&gt;

## &lt;&lt;Data Acquisition&gt;&gt;

AD1 Name : SPD-20A LC Stop Time : 60.00 min  
 AD1 Sampling Frequency : 2 Hz

## &lt;&lt;Autosampler&gt;&gt;

Autosampler Model : LC-2030 Autosampler  
 Enable Autosampler : Use

## &lt;&lt;Oven&gt;&gt;

Oven Model : LC-2030 Oven Enable Oven : Not Used

## &lt;&lt;Column Information&gt;&gt;

Column Name : ZORBAX Eclipse XDB-C18 Column ID : ZORBAX Eclipse XDB-C18  
 Column Length : 150 mm Inner Diameter : 4.6 mm

## &lt;&lt;Mobile Phase Name&gt;&gt;

Mobile Phase A : Acetonitrile Mobile Phase B : Water  
 Mobile Phase C : Methanol Mobile Phase D : Buffer

## &lt;&lt;Pump&gt;&gt;

Mode : Low pressure gradient Pump A : LC-2030 Pump  
 Flow : 0.5000 mL/min B Conc. : 0.0 %  
 C Conc. : 0.0 % D Conc. : 90.0 %

## &lt;&lt;LC Time Program&gt;&gt;

| Time  | Module     | Command         | Value | Comment |
|-------|------------|-----------------|-------|---------|
| 0.01  | Pumps      | Solvent D Conc. | 90    |         |
| 45.00 | Pumps      | Solvent D Conc. | 10    |         |
| 50.00 | Pumps      | Solvent D Conc. | 90    |         |
| 60.00 | Pumps      | Solvent D Conc. | 90    |         |
| 60.00 | Controller | Stop            |       |         |

## &lt;Chromatogram&gt;

mV

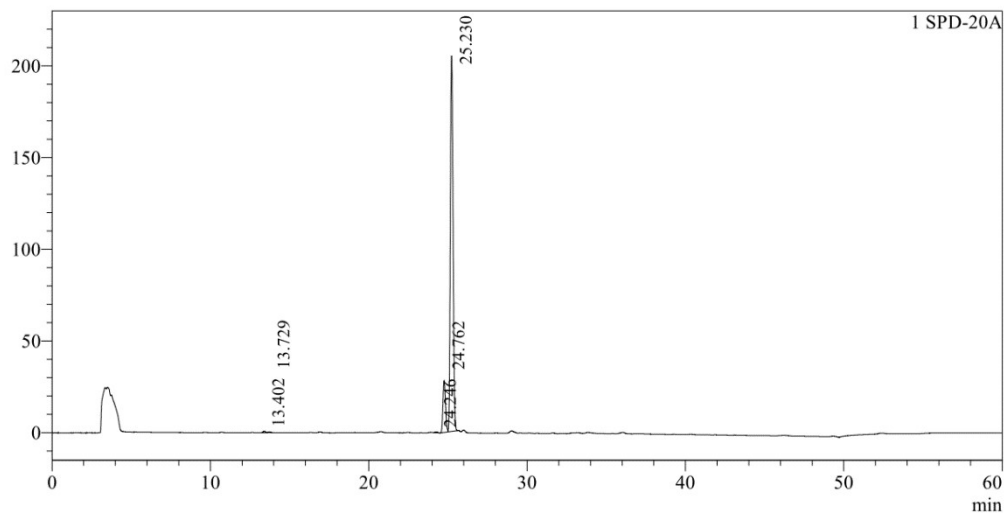

## &lt;Peak Table&gt;

SPD-20A

| Peak# | Ret. Time | Area    | Height | Area/Height | Area%   | Tailing Factor |
|-------|-----------|---------|--------|-------------|---------|----------------|
| 1     | 13.402    | 7624    | 773    | 9.869       | 0.278   | 1.046          |
| 2     | 13.729    | 3509    | 365    | 9.619       | 0.128   | 1.219          |
| 3     | 24.246    | 4863    | 467    | 10.417      | 0.178   | 1.263          |
| 4     | 24.762    | 324055  | 28152  | 11.511      | 11.837  | 1.148          |
| 5     | 25.230    | 2397636 | 204819 | 11.706      | 87.579  | 1.159          |
| Total |           | 2737688 | 234576 |             | 100.000 |                |

## HPLC spectrum of compound 6

## ==== Shimadzu LabSolutions Analysis Report =====

Sample Name : DHT-05530 (10mM NH<sub>4</sub>OAc+ 0.1 HCOOH 60m) Data Filename : 2  
 Method Filename : 61-HPLC Buffer-60min.lcm Batch Filename : 20210705-LC (10mM NH<sub>4</sub>OAc)  
 Vial # : 1-35 Injection Volume : 20 uL  
 Date Acquired : 2021/7/5 下午 10:03:16 Acquired by : System Administrator  
 Date Processed : 2021/7/5 下午 11:03:17 Processed by : System Administrator

## &lt;Method&gt;

## &lt;&lt;Data Acquisition&gt;&gt;

AD1 Name : SPD-20A LC Stop Time : 60.00 min  
 AD1 Sampling Frequency : 2 Hz

## &lt;&lt;Autosampler&gt;&gt;

Autosampler Model : LC-2030 Autosampler  
 Enable Autosampler : Use

## &lt;&lt;Oven&gt;&gt;

Oven Model : LC-2030 Oven Enable Oven : Not Used

## &lt;&lt;Column Information&gt;&gt;

Column Name : ZORBAX Eclipse XDB-C18 Column ID : ZORBAX Eclipse XDB-C18  
 Column Length : 150 mm Inner Diameter : 4.6 mm

## &lt;&lt;Mobile Phase Name&gt;&gt;

Mobile Phase A : Acetonitrile Mobile Phase B : Water  
 Mobile Phase C : Methanol Mobile Phase D : Buffer

## &lt;&lt;Pump&gt;&gt;

Mode : Low pressure gradient Pump A : LC-2030 Pump  
 Flow : 0.5000 mL/min B Conc. : 0.0 %  
 C Conc. : 0.0 % D Conc. : 90.0 %

## &lt;&lt;LC Time Program&gt;&gt;

| Time  | Module     | Command         | Value | Comment |
|-------|------------|-----------------|-------|---------|
| 0.01  | Pumps      | Solvent D Conc. | 90    |         |
| 45.00 | Pumps      | Solvent D Conc. | 10    |         |
| 50.00 | Pumps      | Solvent D Conc. | 90    |         |
| 60.00 | Pumps      | Solvent D Conc. | 90    |         |
| 60.00 | Controller | Stop            |       |         |

## &lt;Chromatogram&gt;

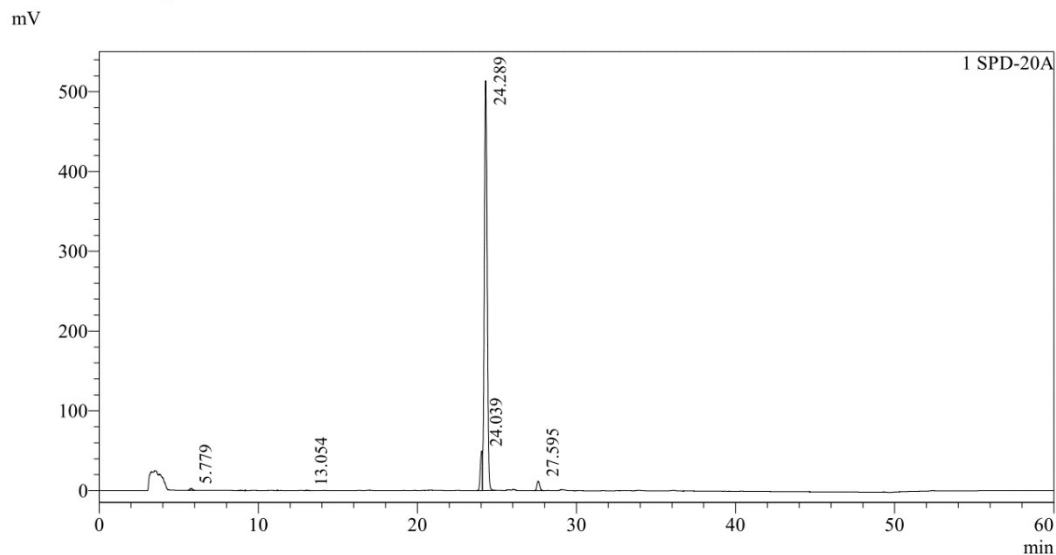

## &lt;Peak Table&gt;

| SPD-20A |           |         |        |             |         |                |
|---------|-----------|---------|--------|-------------|---------|----------------|
| Peak#   | Ret. Time | Area    | Height | Area/Height | Area%   | Tailing Factor |
| 1       | 5.779     | 23426   | 2352   | 9.959       | 0.340   | 1.082          |
| 2       | 13.054    | 4269    | 441    | 9.673       | 0.062   | 1.213          |
| 3       | 24.039    | 434390  | 49544  | 8.768       | 6.300   | --             |
| 4       | 24.289    | 6290796 | 513677 | 12.247      | 91.236  | --             |
| 5       | 27.595    | 142222  | 11865  | 11.986      | 2.063   | 1.164          |
| Total   |           | 6895102 | 577880 |             | 100.000 |                |

## HPLC spectrum of compound 8

## ==== Shimadzu LabSolutions Analysis Report ====

Sample Name : DHT-05-quinone (10mM NH<sub>4</sub>OAc+ 0.1 HCOOH 60m) Data Filename  
 Method Filename : 61-HPLC Buffer-60min.lcm Batch Filename : 20210705-LC (10mM NH<sub>4</sub>OAc)  
 Vial # : 1-38 Injection Volume : 20 uL  
 Date Acquired : 2021/7/5 下午 09:02:53 Acquired by : System Administrator  
 Date Processed : 2021/7/5 下午 10:02:54 Processed by : System Administrator

## &lt;Method&gt;

<<Data Acquisition>>  
 AD1 Name : SPD-20A LC Stop Time : 60.00 min  
 AD1 Sampling Frequency : 2 Hz

<<Autosampler>>  
 Autosampler Model : LC-2030 Autosampler  
 Enable Autosampler : Use

<<Oven>>  
 Oven Model : LC-2030 Oven Enable Oven : Not Used

<<Column Information>>  
 Column Name : ZORBAX Eclipse XDB-C18 Column ID : ZORBAX Eclipse XDB-C18  
 Column Length : 150 mm Inner Diameter : 4.6 mm

<<Mobile Phase Name>>  
 Mobile Phase A : Acetonitrile Mobile Phase B : Water  
 Mobile Phase C : Methanol Mobile Phase D : Buffer

<<Pump>>  
 Mode : Low pressure gradient Pump A : LC-2030 Pump  
 Flow : 0.5000 mL/min B Conc. : 0.0 %  
 C Conc. : 0.0 % D Conc. : 90.0 %

<<LC Time Program>>  

| Time  | Module     | Command         | Value | Comment |
|-------|------------|-----------------|-------|---------|
| 0.01  | Pumps      | Solvent D Conc. | 90    |         |
| 45.00 | Pumps      | Solvent D Conc. | 10    |         |
| 50.00 | Pumps      | Solvent D Conc. | 90    |         |
| 60.00 | Pumps      | Solvent D Conc. | 90    |         |
| 60.00 | Controller | Stop            |       |         |

## &lt;Chromatogram&gt;

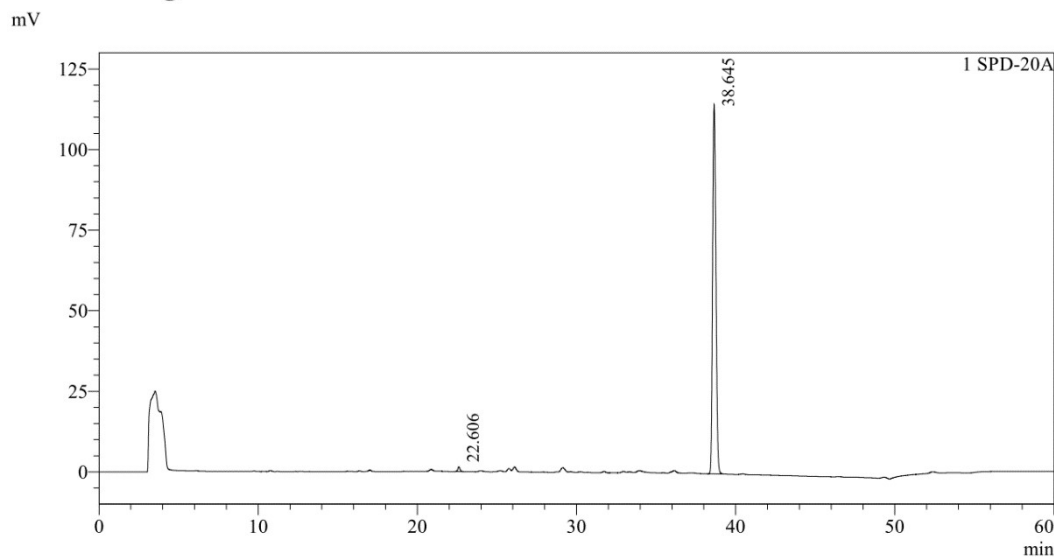

## &lt;Peak Table&gt;

| SPD-20A |           |         |        |             |         |                |
|---------|-----------|---------|--------|-------------|---------|----------------|
| Peak#   | Ret. Time | Area    | Height | Area/Height | Area%   | Tailing Factor |
| 1       | 22.606    | 13986   | 1472   | 9.501       | 0.845   | 1.267          |
| 2       | 38.645    | 1642058 | 114629 | 14.325      | 99.155  | 1.153          |
| Total   |           | 1656045 | 116101 |             | 100.000 |                |



## HPLC spectrum of compound 9

## ==== Shimadzu LabSolutions Analysis Report ====

Sample Name : DHT-05532 (10mM NH<sub>4</sub>OAc+ 0.1 HCOOH 60m) Data Filename : 2  
 Method Filename : 61-HPLC Buffer-60min.lcm Batch Filename : 20210705-LC (10mM NH<sub>4</sub>OAc)  
 Vial # : 1-36 Injection Volume : 20 uL  
 Date Acquired : 2021/7/6 上午 12:04:01 Acquired by : System Administrator  
 Date Processed : 2021/7/6 上午 01:04:04 Processed by : System Administrator

## &lt;Method&gt;

## &lt;&lt;Data Acquisition&gt;&gt;

AD1 Name : SPD-20A LC Stop Time : 60.00 min  
 AD1 Sampling Frequency : 2 Hz

## &lt;&lt;Autosampler&gt;&gt;

Autosampler Model : LC-2030 Autosampler  
 Enable Autosampler : Use

## &lt;&lt;Oven&gt;&gt;

Oven Model : LC-2030 Oven Enable Oven : Not Used

## &lt;&lt;Column Information&gt;&gt;

Column Name : ZORBAX Eclipse XDB-C18 Column ID : ZORBAX Eclipse XDB-C18  
 Column Length : 150 mm Inner Diameter : 4.6 mm

## &lt;&lt;Mobile Phase Name&gt;&gt;

Mobile Phase A : Acetonitrile Mobile Phase B : Water  
 Mobile Phase C : Methanol Mobile Phase D : Buffer

## &lt;&lt;Pump&gt;&gt;

Mode : Low pressure gradient Pump A : LC-2030 Pump  
 Flow : 0.5000 mL/min B Conc. : 0.0 %  
 C Conc. : 0.0 % D Conc. : 90.0 %

## &lt;&lt;LC Time Program&gt;&gt;

| Time  | Module     | Command         | Value | Comment |
|-------|------------|-----------------|-------|---------|
| 0.01  | Pumps      | Solvent D Conc. | 90    |         |
| 45.00 | Pumps      | Solvent D Conc. | 10    |         |
| 50.00 | Pumps      | Solvent D Conc. | 90    |         |
| 60.00 | Pumps      | Solvent D Conc. | 90    |         |
| 60.00 | Controller | Stop            |       |         |

## &lt;Chromatogram&gt;

mV

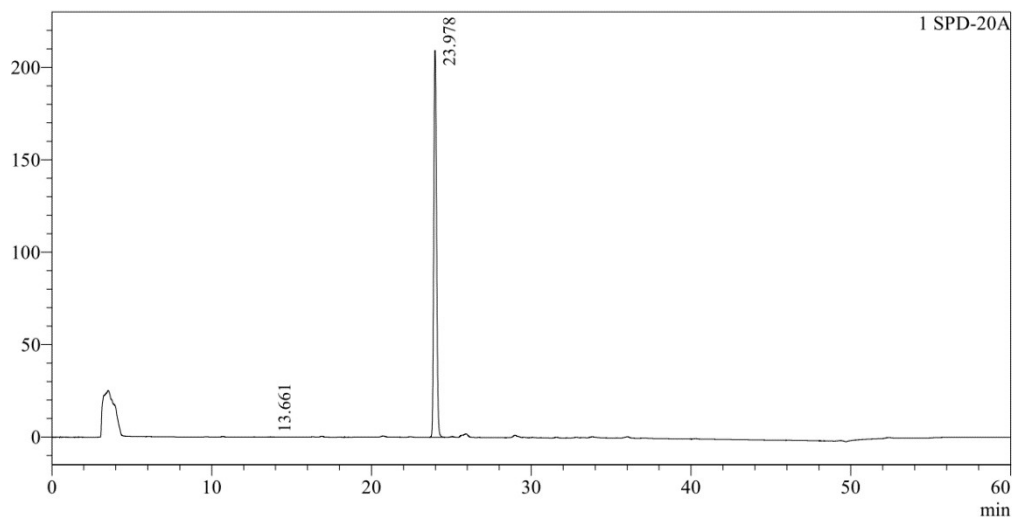

## &lt;Peak Table&gt;

SPD-20A

| Peak# | Ret. Time | Area    | Height | Area/Height | Area%   | Tailing Factor |
|-------|-----------|---------|--------|-------------|---------|----------------|
| 1     | 13.661    | 1152    | 108    | 10.622      | 0.047   | 1.400          |
| 2     | 23.978    | 2471312 | 209400 | 11.802      | 99.953  | 1.153          |
| Total |           | 2472463 | 209509 |             | 100.000 |                |

## HPLC spectrum of compound 13

## ==== Shimadzu LabSolutions Analysis Report ====

Sample Name : DHT-05485 (Ag 10mM AmAc HCOOH pH 2.5 60m) Data Filename  
 Method Filename : 61-HPLC Buffer-60min.lcm Batch Filename : 20210909-LC-10m - ph 2.5.lc  
 Vial # : 1-12 Injection Volume : 20 uL  
 Date Acquired : 2021/9/10 上午 01:17:41 Acquired by : System Administrator  
 Date Processed : 2021/9/10 上午 02:17:43 Processed by : System Administrator

## &lt;Method&gt;

## &lt;&lt;Data Acquisition&gt;&gt;

AD1 Name : SPD-20A LC Stop Time : 60.00 min  
 AD1 Sampling Frequency : 2 Hz

## &lt;&lt;Autosampler&gt;&gt;

Autosampler Model : LC-2030 Autosampler  
 Enable Autosampler : Use

## &lt;&lt;Oven&gt;&gt;

Oven Model : LC-2030 Oven Enable Oven : Not Used

## &lt;&lt;Column Information&gt;&gt;

Column Name : ZORBAX Eclipse XDB-C18 Column ID : ZORBAX Eclipse XDB-C18  
 Column Length : 150 mm Inner Diameter : 4.6 mm

## &lt;&lt;Mobile Phase Name&gt;&gt;

Mobile Phase A : Acetonitrile Mobile Phase B : Water  
 Mobile Phase C : Methanol Mobile Phase D : Buffer

## &lt;&lt;Pump&gt;&gt;

Mode : Low pressure gradient Pump A : LC-2030 Pump  
 Flow : 0.5000 mL/min B Conc. : 0.0 %  
 C Conc. : 0.0 % D Conc. : 90.0 %

## &lt;&lt;LC Time Program&gt;&gt;

| Time  | Module     | Command         | Value | Comment |
|-------|------------|-----------------|-------|---------|
| 0.01  | Pumps      | Solvent D Conc. | 90    |         |
| 45.00 | Pumps      | Solvent D Conc. | 10    |         |
| 50.00 | Pumps      | Solvent D Conc. | 90    |         |
| 60.00 | Pumps      | Solvent D Conc. | 90    |         |
| 60.00 | Controller | Stop            |       |         |

## &lt;Chromatogram&gt;

mV

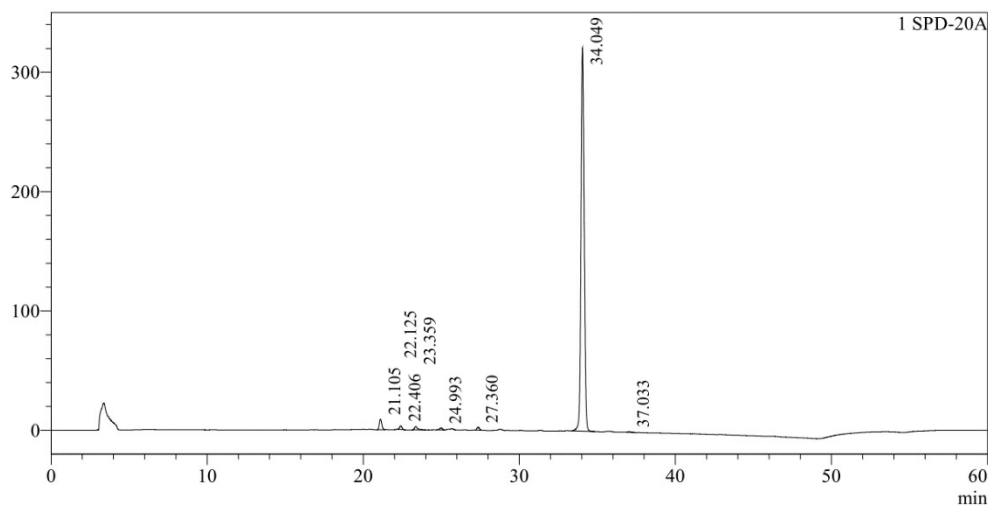

## &lt;Peak Table&gt;

SPD-20A

| Peak# | Ret. Time | Area    | Height | Area/Height | Area%   | Tailing Factor |
|-------|-----------|---------|--------|-------------|---------|----------------|
| 1     | 21.105    | 95144   | 8845   | 10.757      | 1.975   | 1.154          |
| 2     | 22.125    | 1379    | 174    | 7.941       | 0.029   | 0.891          |
| 3     | 22.406    | 32168   | 2918   | 11.023      | 0.668   | 1.141          |
| 4     | 23.359    | 41781   | 2965   | 14.090      | 0.867   | 2.083          |
| 5     | 24.993    | 22224   | 1669   | 13.313      | 0.461   | 0.872          |
| 6     | 27.360    | 28188   | 2575   | 10.947      | 0.585   | 1.156          |
| 7     | 34.049    | 4590039 | 321423 | 14.280      | 95.286  | 1.082          |
| 8     | 37.033    | 6200    | 461    | 13.464      | 0.129   | 1.420          |
| Total |           | 4817124 | 341029 |             | 100.000 |                |

## HPLC spectrum of compound 14

## ==== Shimadzu LabSolutions Analysis Report =====

Sample Name : DHT-01125 (Ag 10mM AmAc HCOOH pH 2.5 60m) Data Filename  
 Method Filename : 61-HPLC Buffer-60min.lcm Batch Filename : 20210909-LC-10m - ph 2.5.lc  
 Vial # : 1-11 Injection Volume : 20 uL  
 Date Acquired : 2021/9/10 上午 12:17:17 Acquired by : System Administrator  
 Date Processed : 2021/9/10 上午 01:17:19 Processed by : System Administrator

## &lt;Method&gt;

## &lt;&lt;Data Acquisition&gt;&gt;

AD1 Name : SPD-20A LC Stop Time : 60.00 min  
 AD1 Sampling Frequency : 2 Hz

## &lt;&lt;Autosampler&gt;&gt;

Autosampler Model : LC-2030 Autosampler  
 Enable Autosampler : Use

## &lt;&lt;Oven&gt;&gt;

Oven Model : LC-2030 Oven Enable Oven : Not Used

## &lt;&lt;Column Information&gt;&gt;

Column Name : ZORBAX Eclipse XDB-C18 Column ID : ZORBAX Eclipse XDB-C18  
 Column Length : 150 mm Inner Diameter : 4.6 mm

## &lt;&lt;Mobile Phase Name&gt;&gt;

Mobile Phase A : Acetonitrile Mobile Phase B : Water  
 Mobile Phase C : Methanol Mobile Phase D : Buffer

## &lt;&lt;Pump&gt;&gt;

Mode : Low pressure gradient Pump A : LC-2030 Pump  
 Flow : 0.5000 mL/min B Conc. : 0.0 %  
 C Conc. : 0.0 % D Conc. : 90.0 %

## &lt;&lt;LC Time Program&gt;&gt;

| Time  | Module     | Command         | Value | Comment |
|-------|------------|-----------------|-------|---------|
| 0.01  | Pumps      | Solvent D Conc. | 90    |         |
| 45.00 | Pumps      | Solvent D Conc. | 10    |         |
| 50.00 | Pumps      | Solvent D Conc. | 90    |         |
| 60.00 | Pumps      | Solvent D Conc. | 90    |         |
| 60.00 | Controller | Stop            |       |         |

## &lt;Chromatogram&gt;

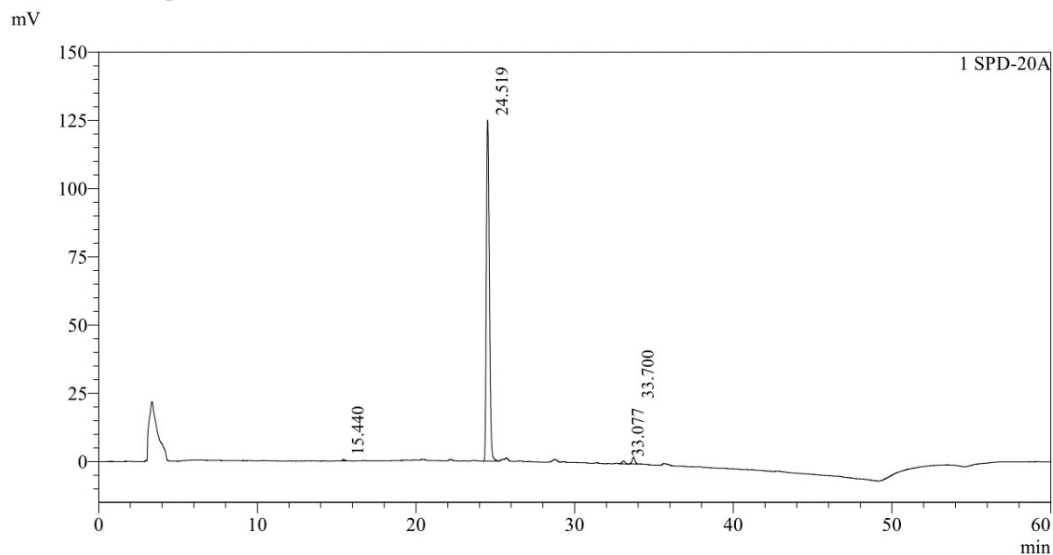

## &lt;Peak Table&gt;

| SPD-20A |           |         |        |             |         |                |
|---------|-----------|---------|--------|-------------|---------|----------------|
| Peak#   | Ret. Time | Area    | Height | Area/Height | Area%   | Tailing Factor |
| 1       | 15.440    | 5312    | 577    | 9.205       | 0.309   | 1.191          |
| 2       | 24.519    | 1668033 | 125108 | 13.333      | 97.088  | 1.257          |
| 3       | 33.077    | 14435   | 1019   | 14.165      | 0.840   | 1.139          |
| 4       | 33.700    | 30284   | 2436   | 12.430      | 1.763   | 1.126          |
| Total   |           | 1718064 | 129141 |             | 100.000 |                |

## HPLC spectrum of compound 15

## ==== Shimadzu LabSolutions Analysis Report ====

Sample Name : DHT-01123 (Ag 10mM AmAc HCOOH pH 2.5 60m) Data Filename  
 Method Filename : 61-HPLC Buffer-60min.lcm Batch Filename : 20210909-LC-10m - ph 2.5.lc  
 Vial # : 1-10 Injection Volume : 20 uL  
 Date Acquired : 2021/9/9 下午 11:16:54 Acquired by : System Administrator  
 Date Processed : 2021/9/10 上午 12:16:56 Processed by : System Administrator

## &lt;Method&gt;

## &lt;&lt;Data Acquisition&gt;&gt;

AD1 Name : SPD-20A LC Stop Time : 60.00 min  
 AD1 Sampling Frequency : 2 Hz

## &lt;&lt;Autosampler&gt;&gt;

Autosampler Model : LC-2030 Autosampler  
 Enable Autosampler : Use

## &lt;&lt;Oven&gt;&gt;

Oven Model : LC-2030 Oven Enable Oven : Not Used

## &lt;&lt;Column Information&gt;&gt;

Column Name : ZORBAX Eclipse XDB-C18 Column ID : ZORBAX Eclipse XDB-C18  
 Column Length : 150 mm Inner Diameter : 4.6 mm

## &lt;&lt;Mobile Phase Name&gt;&gt;

Mobile Phase A : Acetonitrile Mobile Phase B : Water  
 Mobile Phase C : Methanol Mobile Phase D : Buffer

## &lt;&lt;Pump&gt;&gt;

Mode : Low pressure gradient Pump A : LC-2030 Pump  
 Flow : 0.5000 mL/min B Conc. : 0.0 %  
 C Conc. : 0.0 % D Conc. : 90.0 %

## &lt;&lt;LC Time Program&gt;&gt;

| Time  | Module     | Command         | Value | Comment |
|-------|------------|-----------------|-------|---------|
| 0.01  | Pumps      | Solvent D Conc. | 90    |         |
| 45.00 | Pumps      | Solvent D Conc. | 10    |         |
| 50.00 | Pumps      | Solvent D Conc. | 90    |         |
| 60.00 | Pumps      | Solvent D Conc. | 90    |         |
| 60.00 | Controller | Stop            |       |         |

## &lt;Chromatogram&gt;

mV

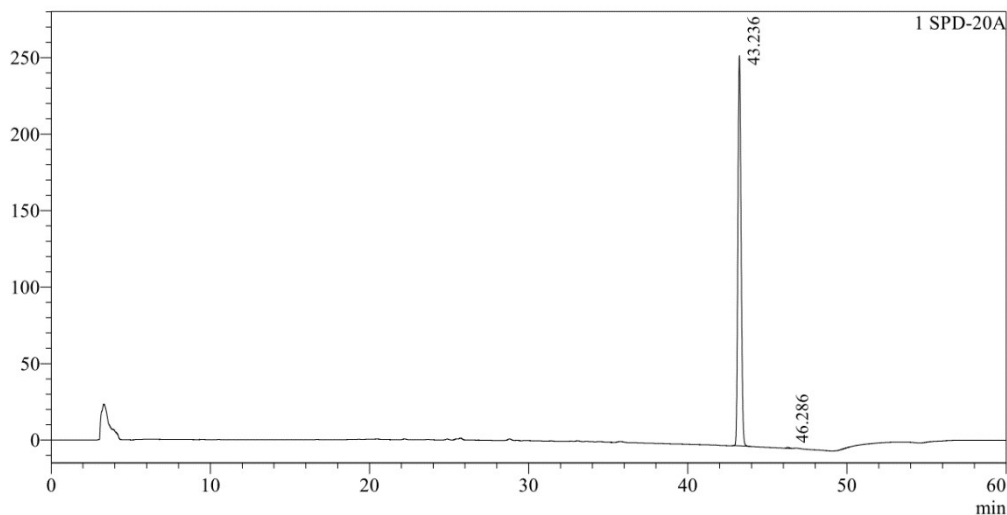

## &lt;Peak Table&gt;

| SPD-20A |           |         |        |             |         |                |
|---------|-----------|---------|--------|-------------|---------|----------------|
| Peak#   | Ret. Time | Area    | Height | Area/Height | Area%   | Tailing Factor |
| 1       | 43.236    | 3473308 | 255082 | 13.616      | 99.832  | 1.161          |
| 2       | 46.286    | 5841    | 542    | 10.775      | 0.168   | 1.204          |
| Total   |           | 3479149 | 255624 |             | 100.000 |                |

**<sup>1</sup>H Spectra for compound 1**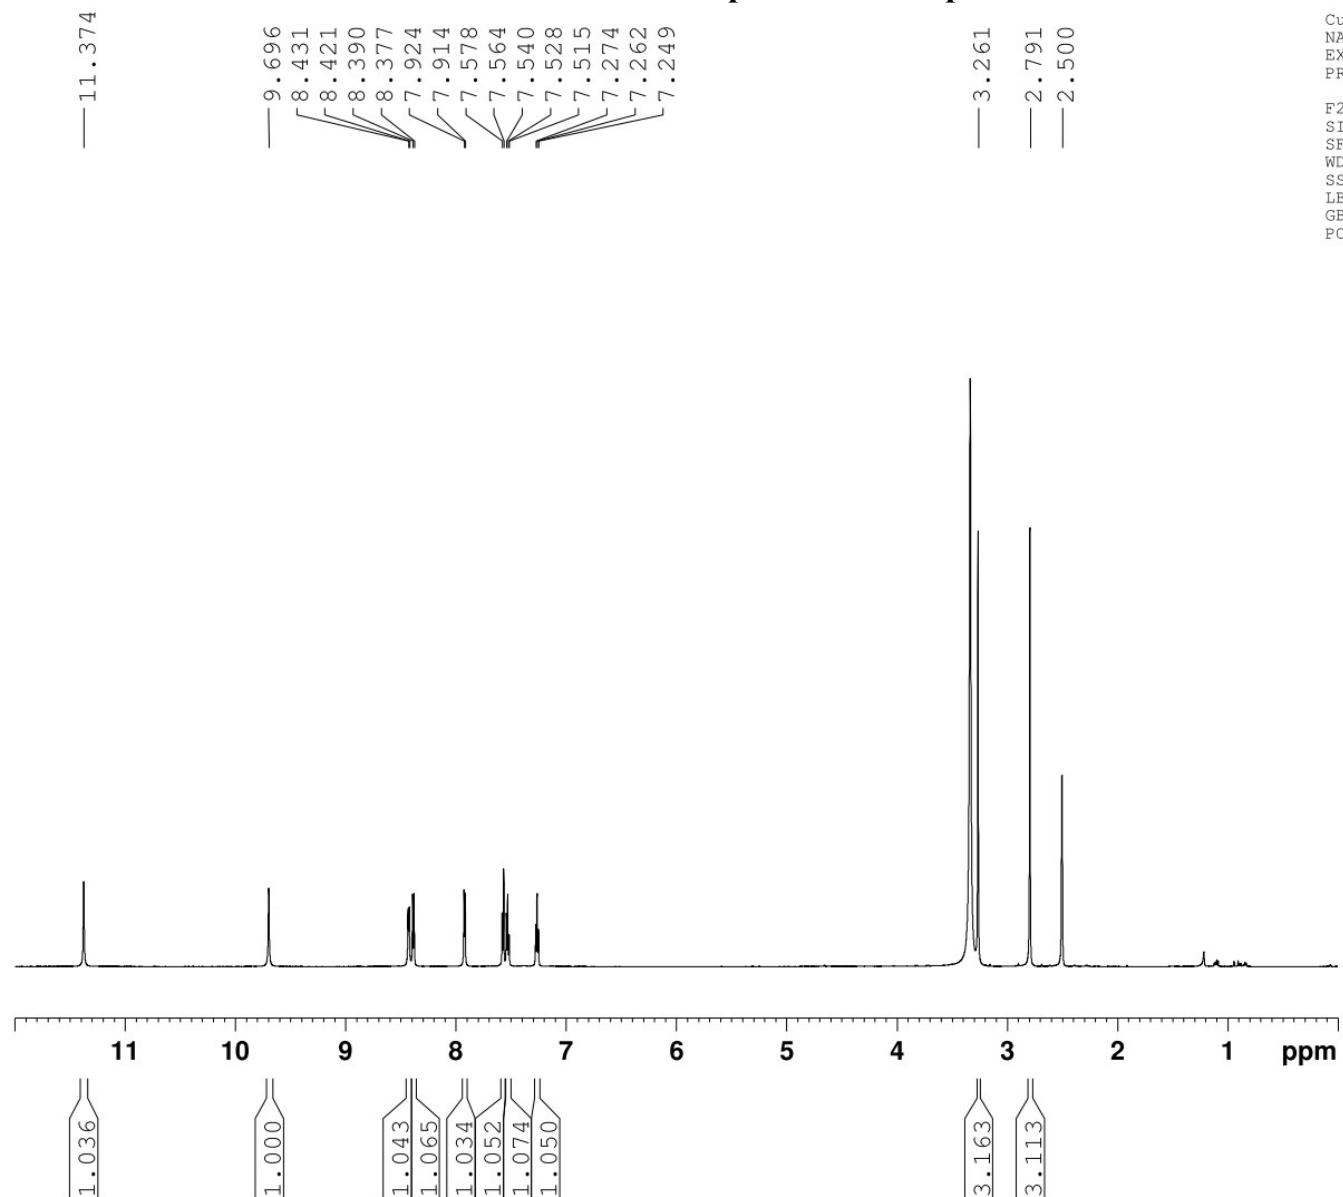

Current Data Parameters  
NAME PROTON\_20210702\_02.fid - new  
EXPNO 1  
PROCNO 1  
  
F2 - Processing parameters  
SI 65536  
SF 599.8300392 MHz  
WDW no  
SSB 0  
LB 0 Hz  
GB 0  
PC 1.00

**<sup>1</sup>H Spectra for compound 2**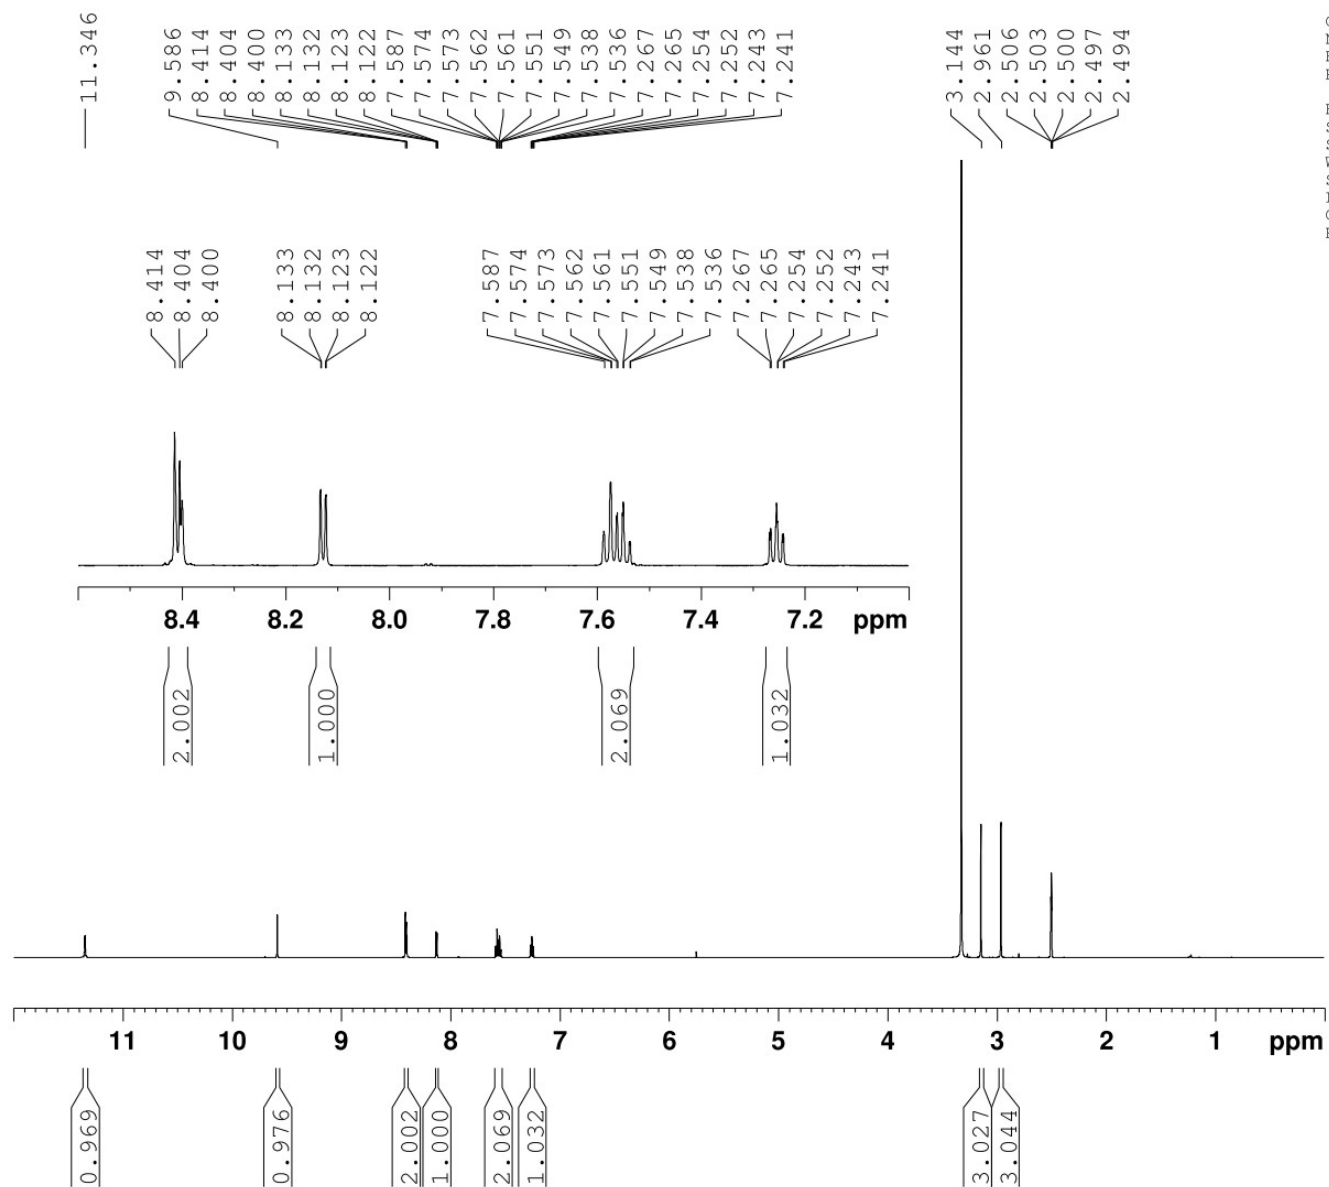

Current Data Parameters  
NAME PROTON\_20210727\_02.fid - new  
EXPNO 1  
PROCNO 1

F2 - Processing parameters  
SI 65536  
SF 599.8300382 MHz  
WDW no  
SSB 0  
LB 0 Hz  
GB 0  
PC 1.00

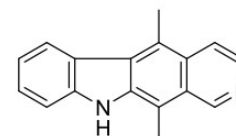

**$^1\text{H}$  Spectra for compound 3**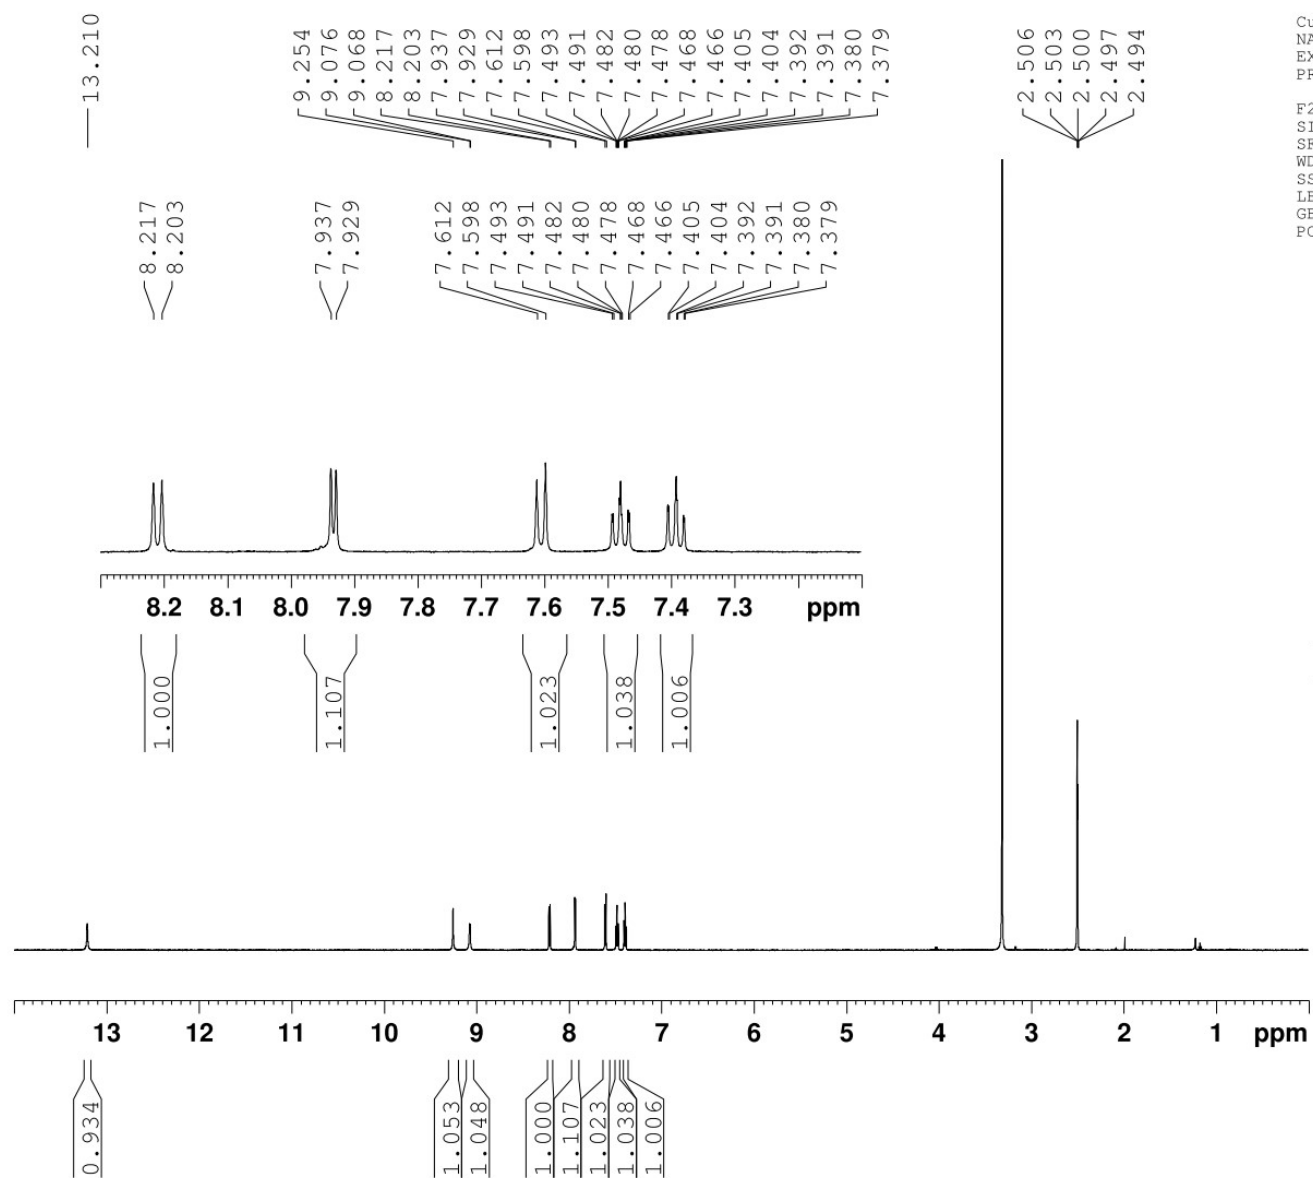

Current Data Parameters  
NAME PROTON\_20210629\_01.fid - new  
EXPNO 1  
PROCNO 1

F2 - Processing parameters  
SI 65536  
SF 599.8300389 MHz  
WDW no  
SSB 0  
LB 0 Hz  
GB 0  
PC 1.00

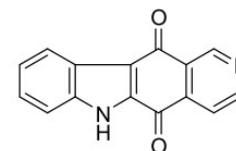

**<sup>1</sup>H Spectra for compound 4**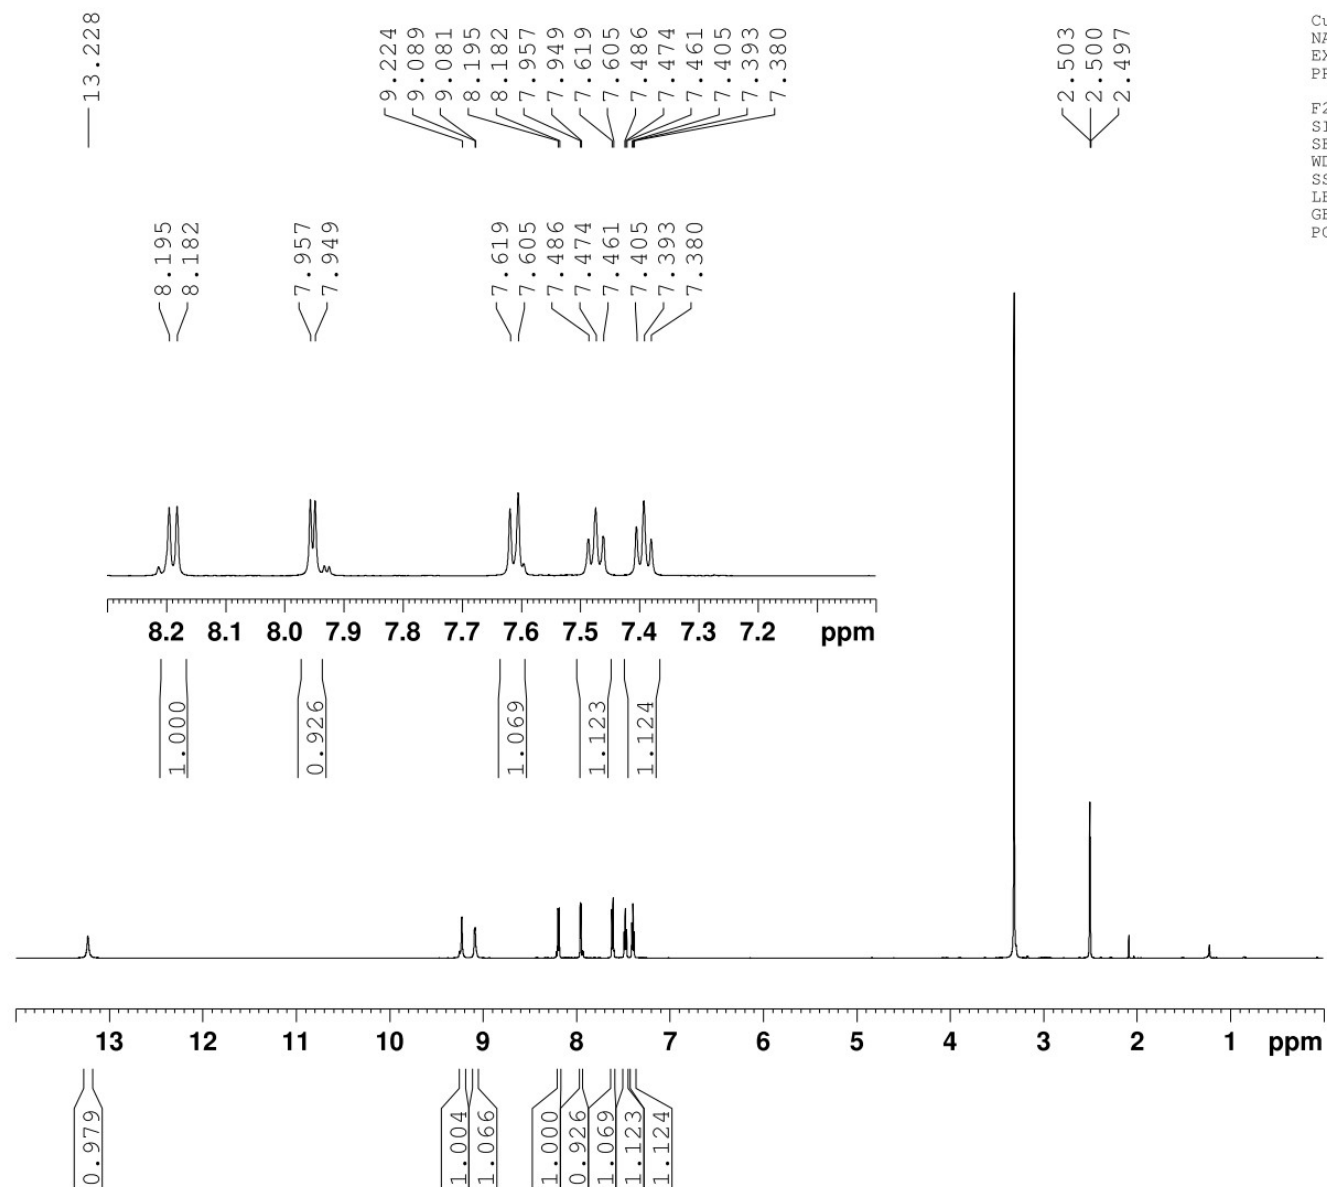

Current Data Parameters  
NAME PROTON\_20200605\_02.fid - new  
EXPNO 1  
PROCNO 1

F2 - Processing parameters  
SI 65536  
SF 599.8300380 MHz  
WDW no  
SSB 0  
LB 0 Hz  
GB 0  
PC 1.00

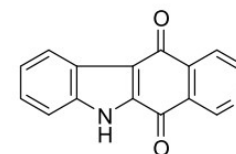



**<sup>1</sup>H Spectra for compound 6**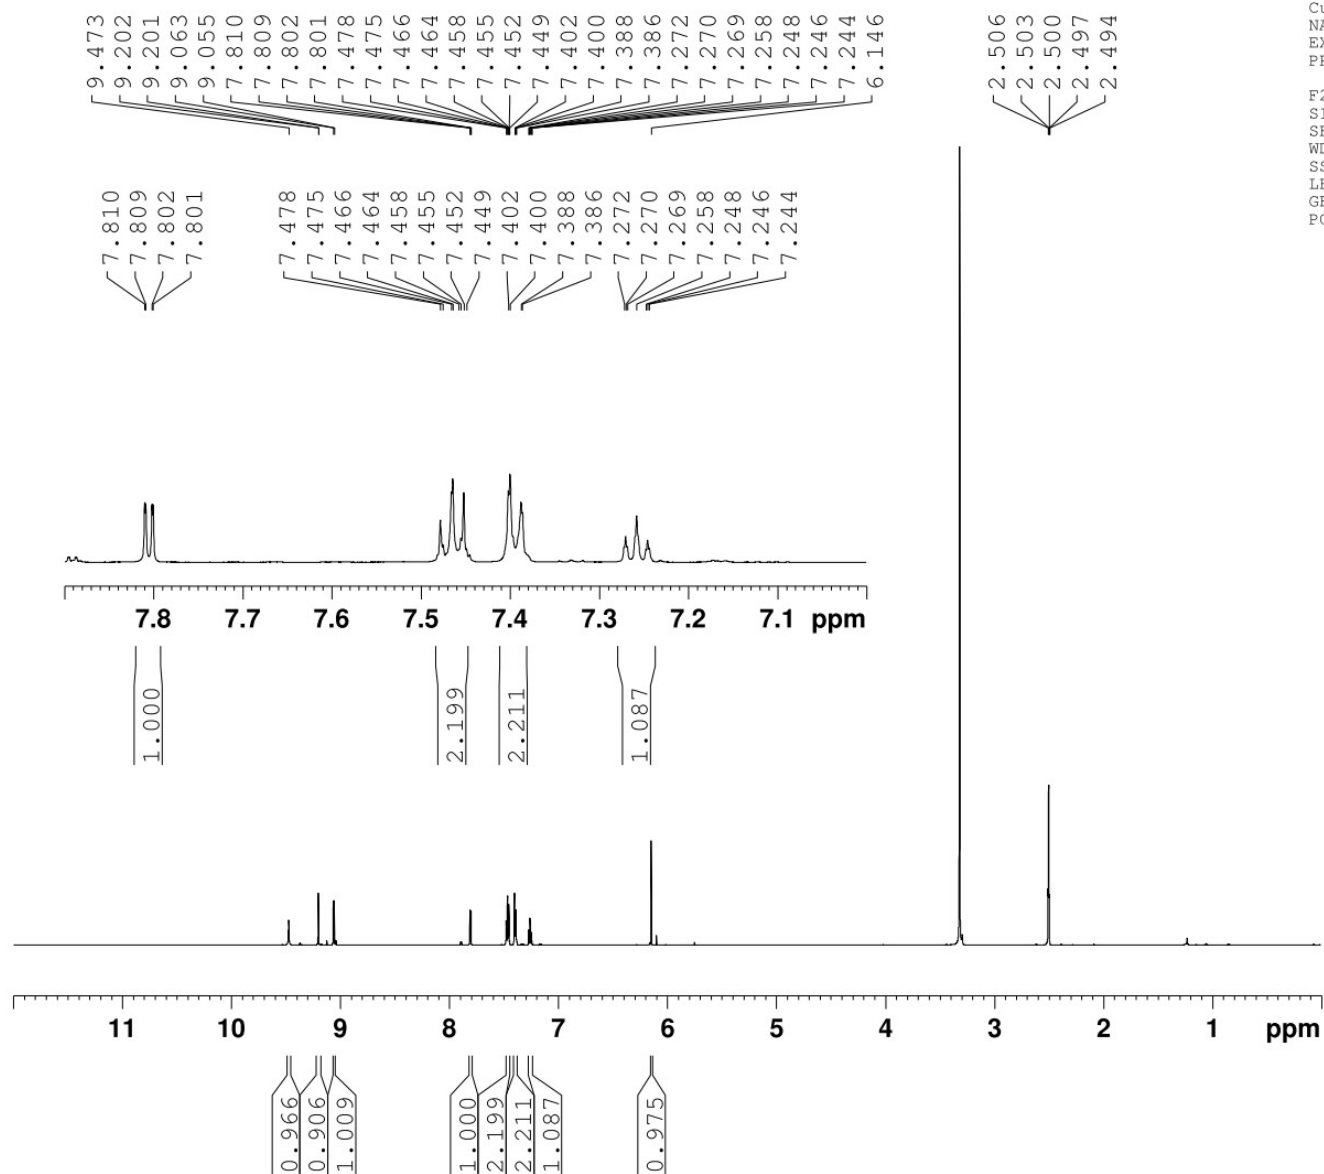

Current Data Parameters  
NAME PROTON\_20210602\_02.fid - new  
EXPNO 1  
PROCNO 1

F2 - Processing parameters  
SI 65536  
SF 599.8300388 MHz  
WDW no  
SSB 0  
LB 0 Hz  
GB 0  
PC 1.00

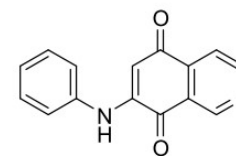

# <sup>1</sup>H Spectra for compound 9

0601-DHT-quinone

Sample Name 0601-DHT-quinone  
Date collected 2021-06-01Pulse sequence PROTON  
Solvent cdcl3Temperature 27  
Spectrometer Agilent-NMR-vnmrs600Study owner tmu  
Operator tmu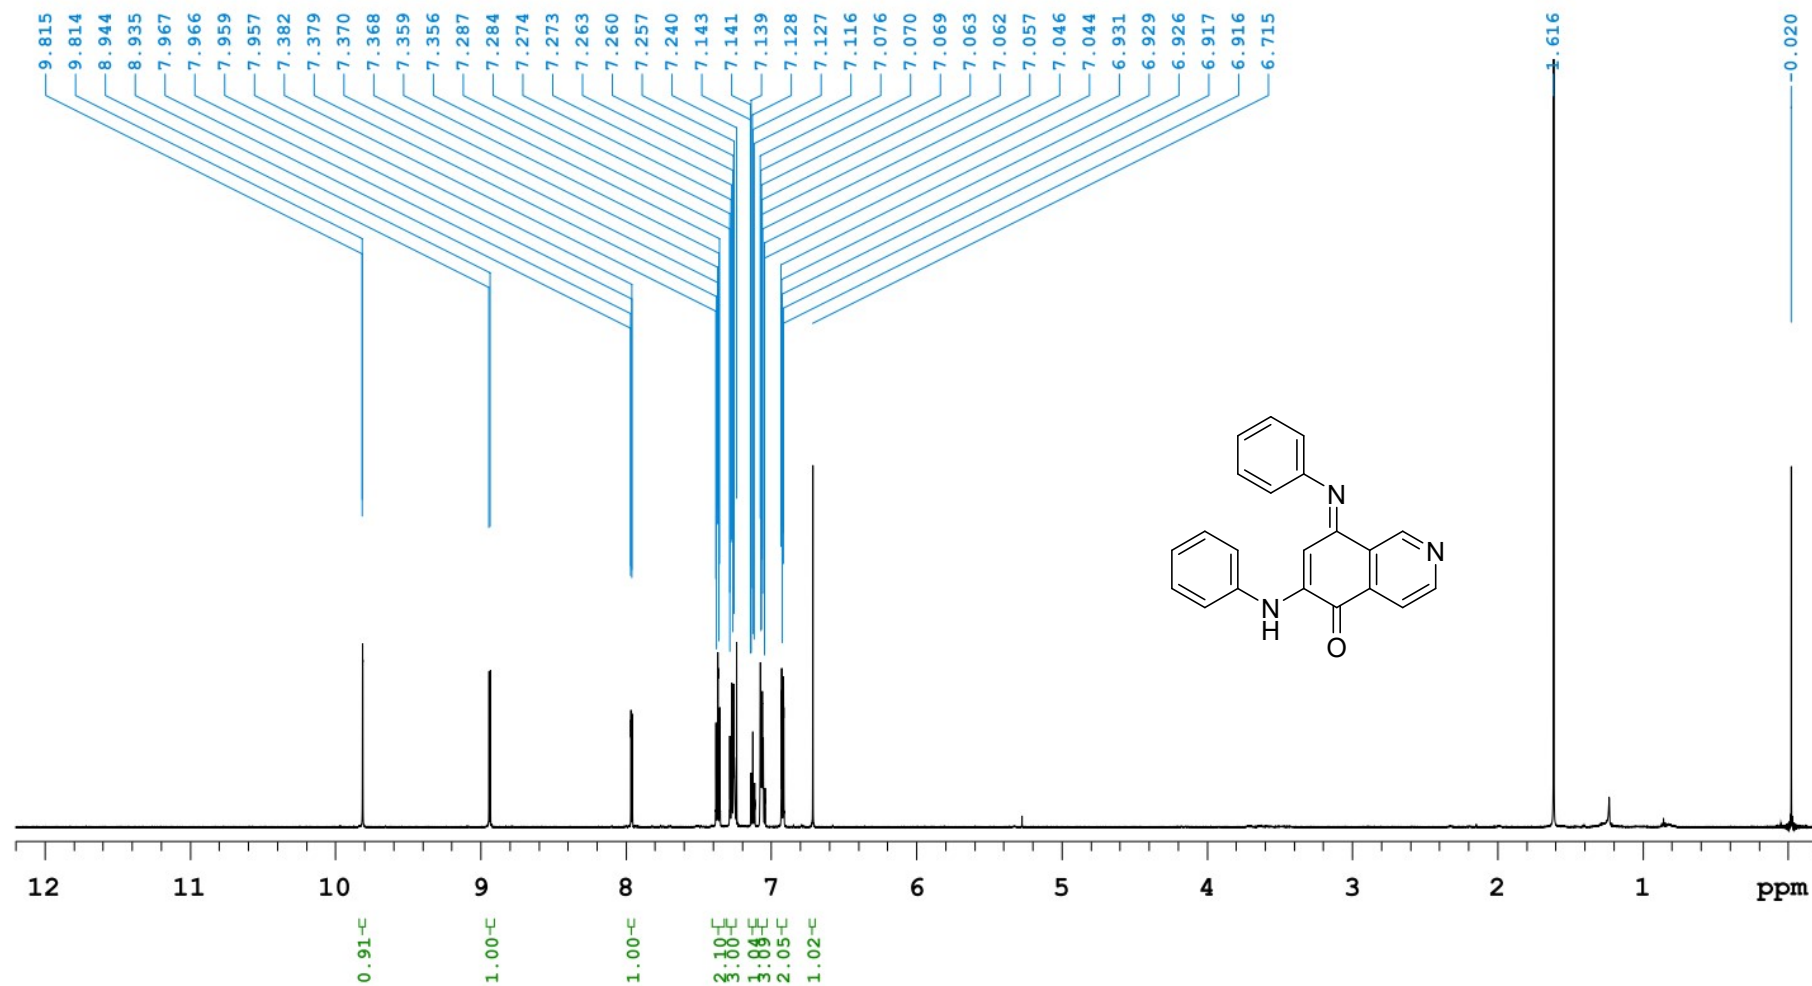

**<sup>1</sup>H Spectra for compound 9**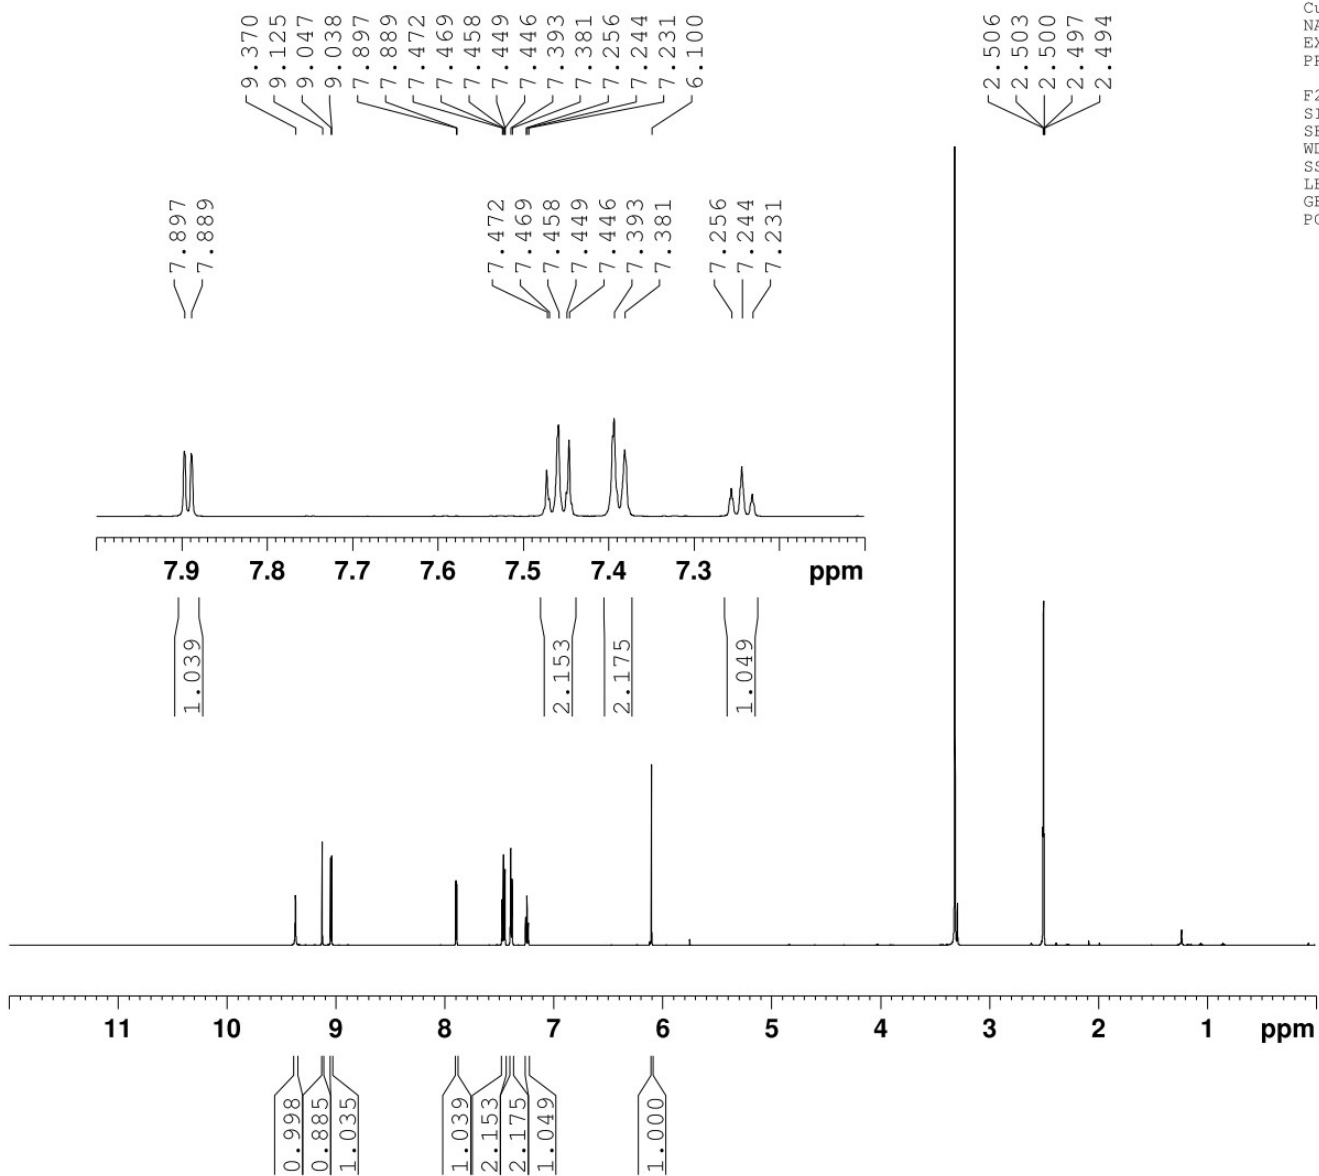

Current Data Parameters  
 NAME PROTON\_20210602\_02.fid - new  
 EXPNO 1  
 PROCNO 1

F2 - Processing parameters  
 SI 65536  
 SF 599.8300388 MHz  
 WDW no  
 SSB 0  
 LB 0 Hz  
 GB 0  
 PC 1.00

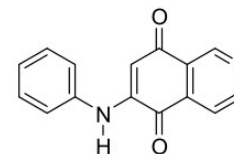

**<sup>1</sup>H Spectra for compound 13**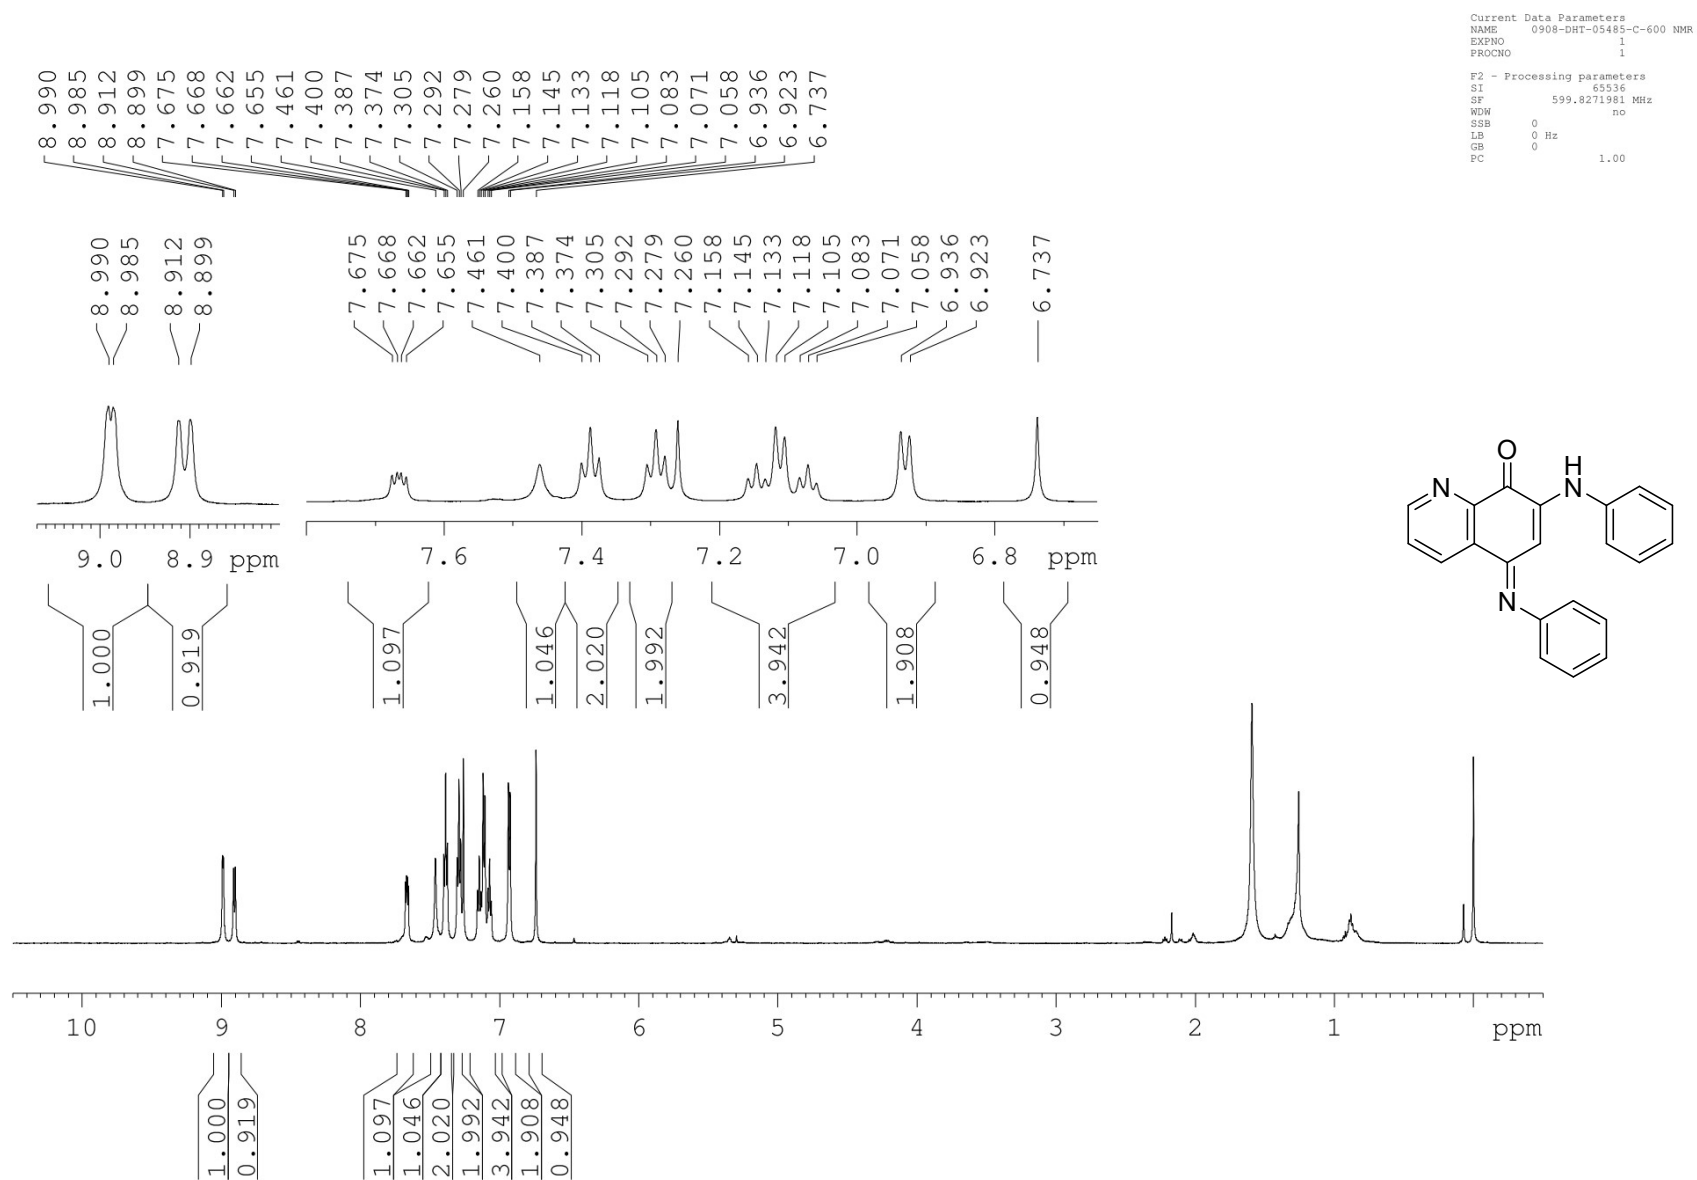

**<sup>1</sup>H Spectra for compound 14**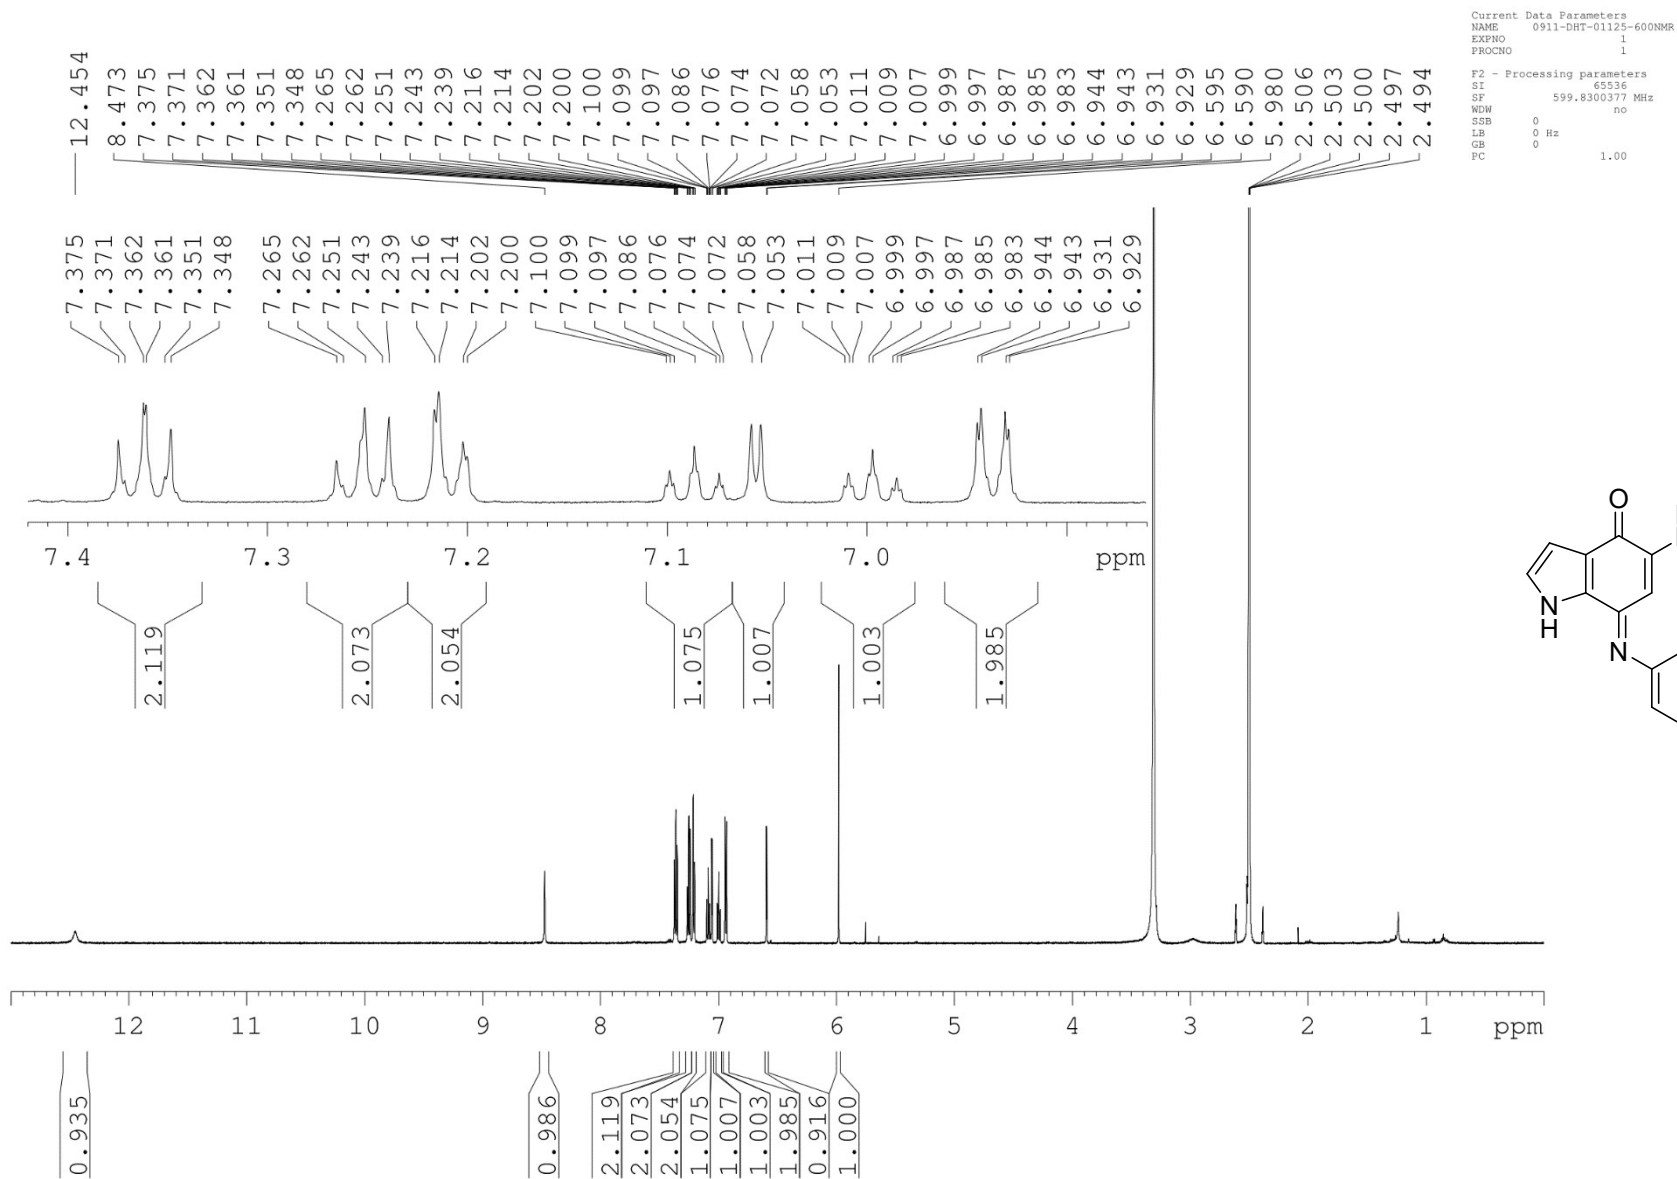

**<sup>1</sup>H Spectra for compound 15**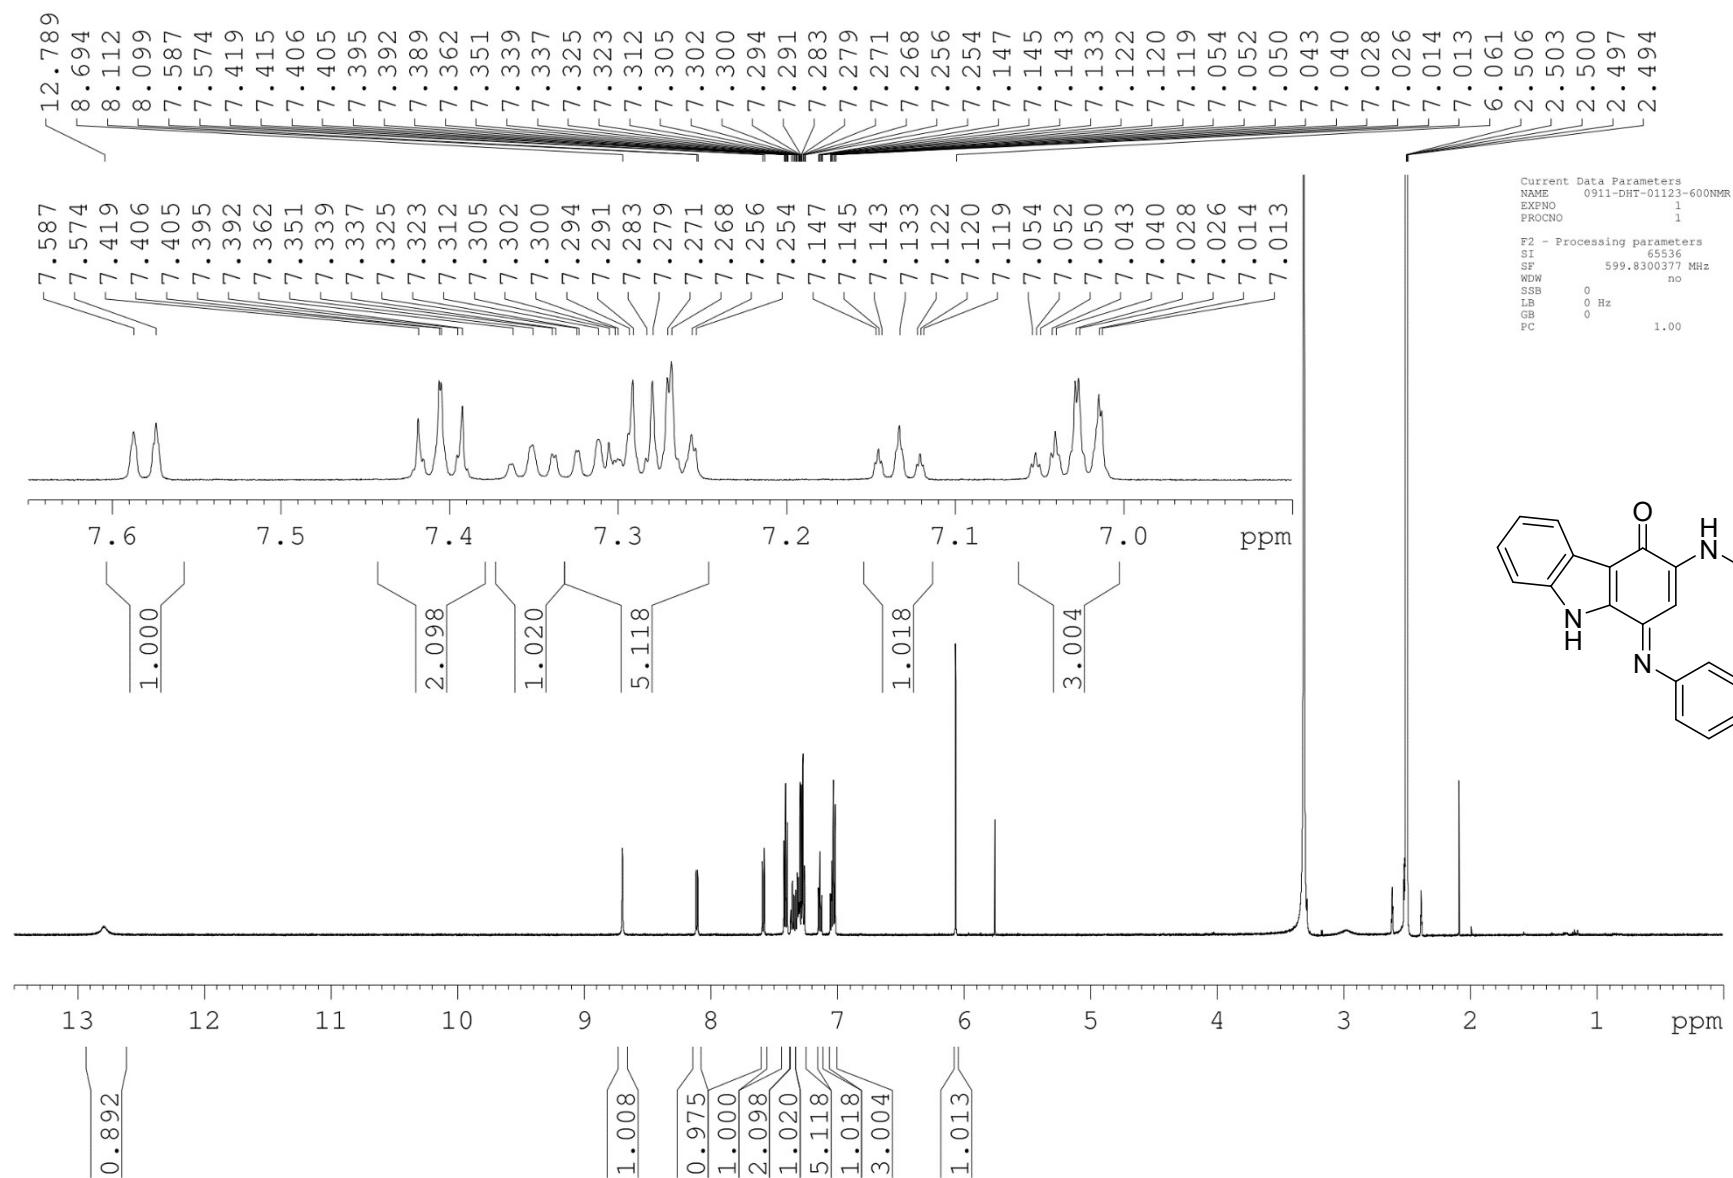

**$^{13}\text{C}$  Spectra for compound 1**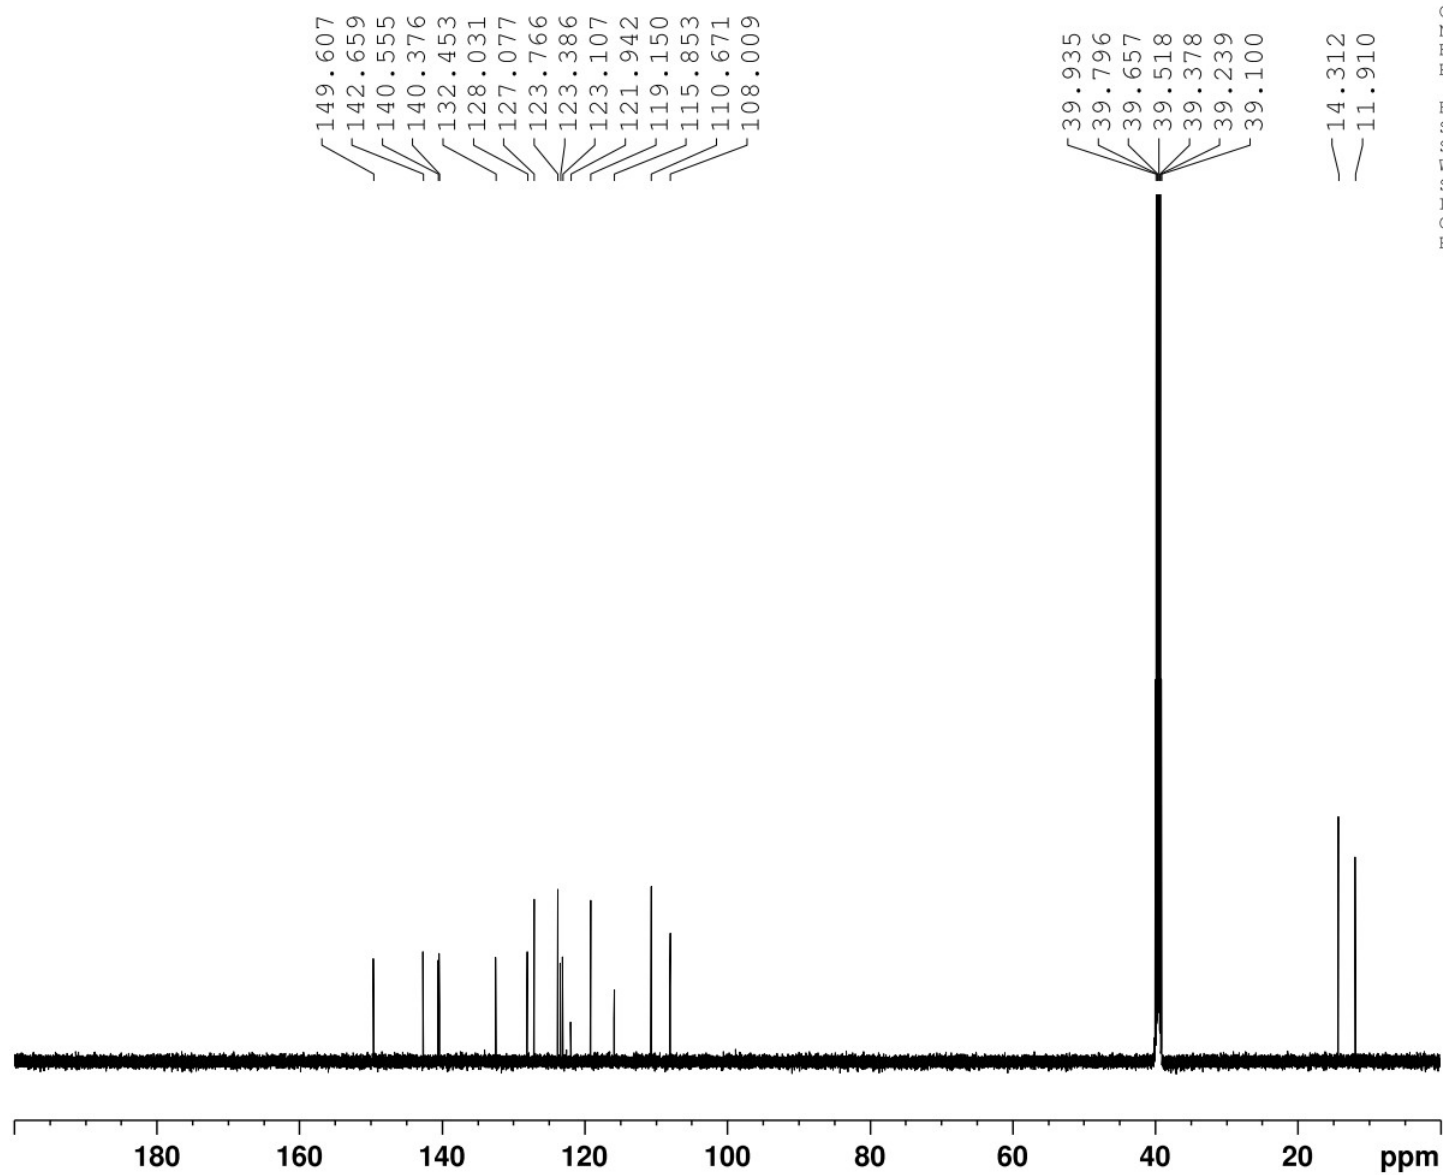

Current Data Parameters  
NAME CARBON\_20210702\_01.fid - new  
EXPNO 1  
PROCNO 1  
F2 - Processing parameters  
SI 65536  
SF 150.8296034 MHz  
WDW no  
SSB 0  
LB 0 Hz  
GB 0  
PC 1.00

**$^{13}\text{C}$  Spectra for compound 2**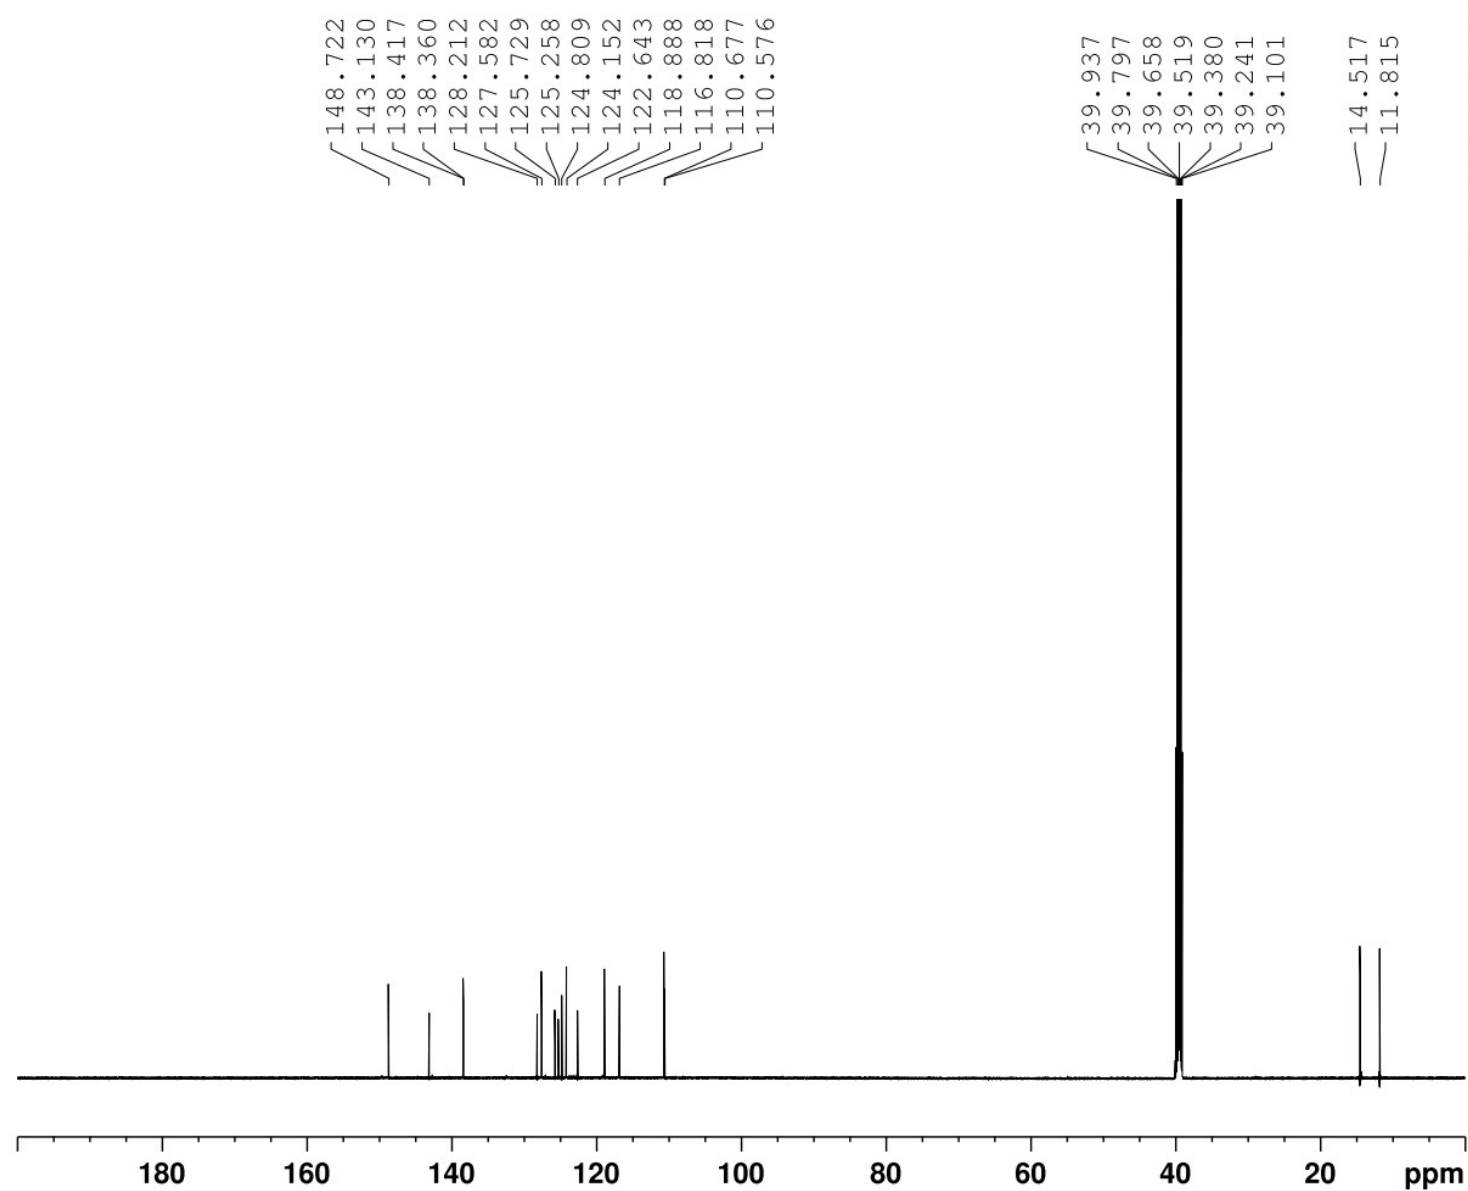

Current Data Parameters  
NAME CARBON\_20210729\_01.fid - new  
EXPNO 1  
PROCNO 1

F2 - Processing parameters  
SI 65536  
SF 150.8306883 MHz  
WDW no  
SSB 0  
LB 0 Hz  
GB 0  
PC 1.00

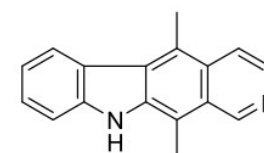



**$^{13}\text{C}$  Spectra for compound 3**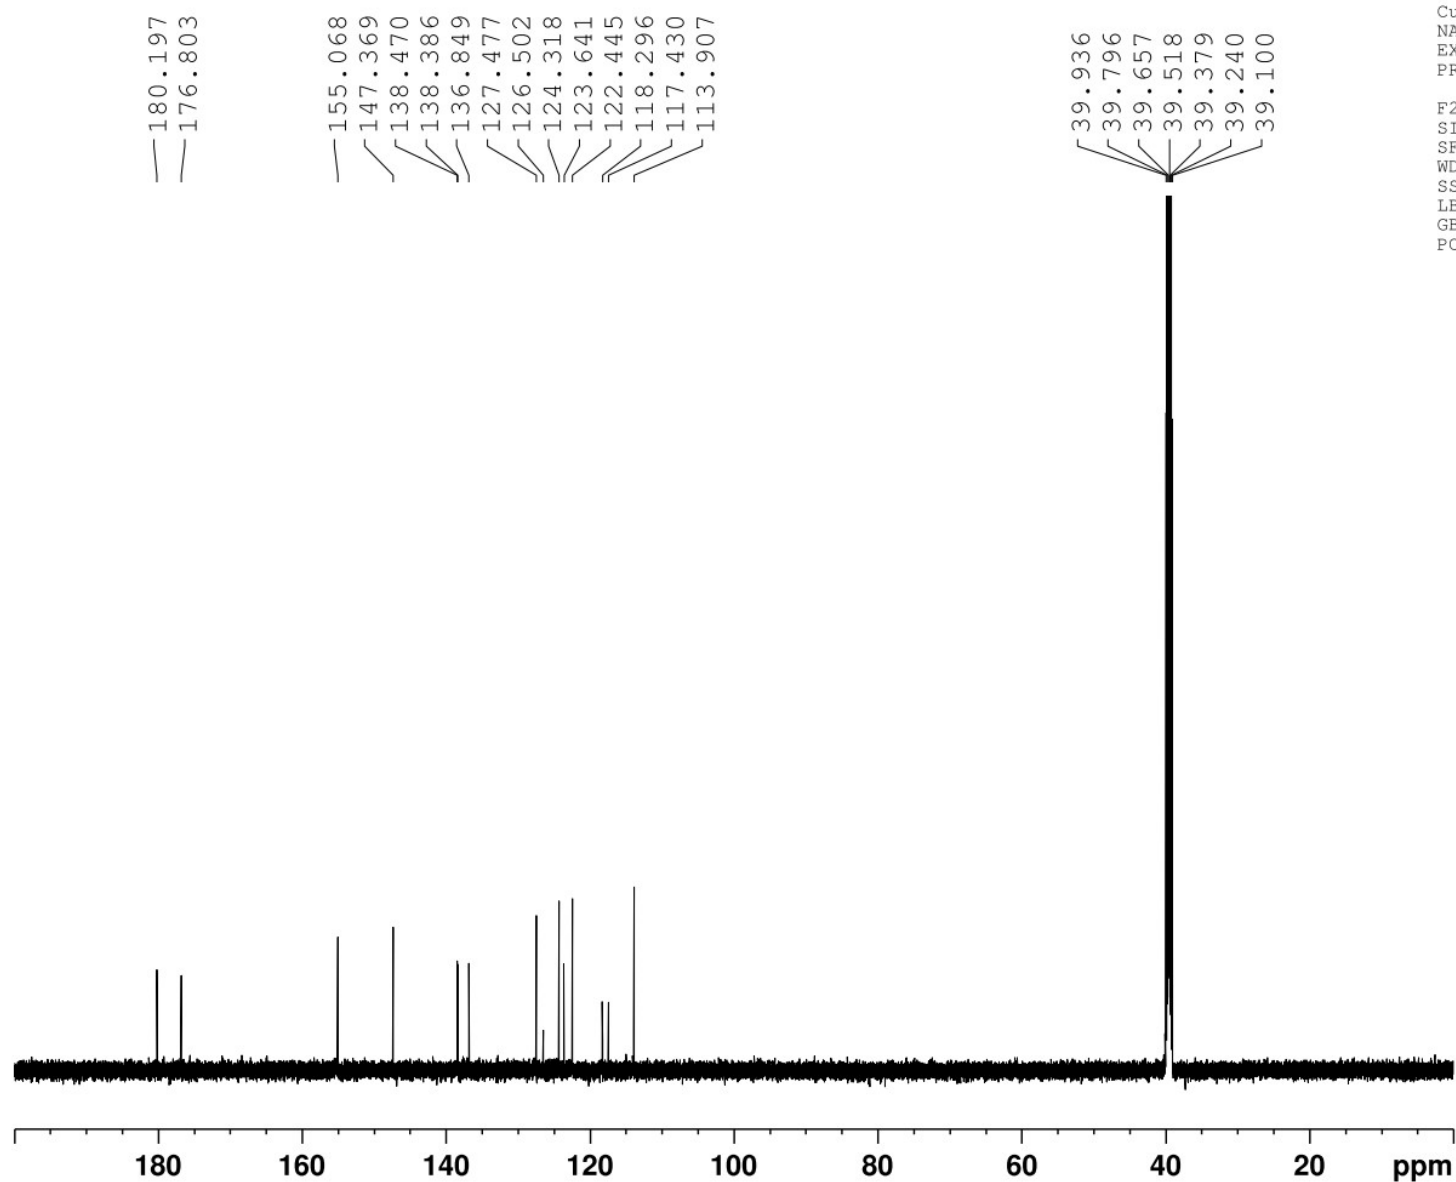

Current Data Parameters  
NAME CARBON\_20210701\_01.fid - new  
EXPNO 1  
PROCNO 1

F2 - Processing parameters  
SI 65536  
SF 150.8296040 MHz  
WDW no  
SSB 0  
LB 0 Hz  
GB 0  
PC 1.00

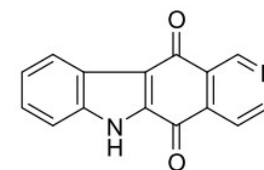

**$^{13}\text{C}$  Spectra for compound 4**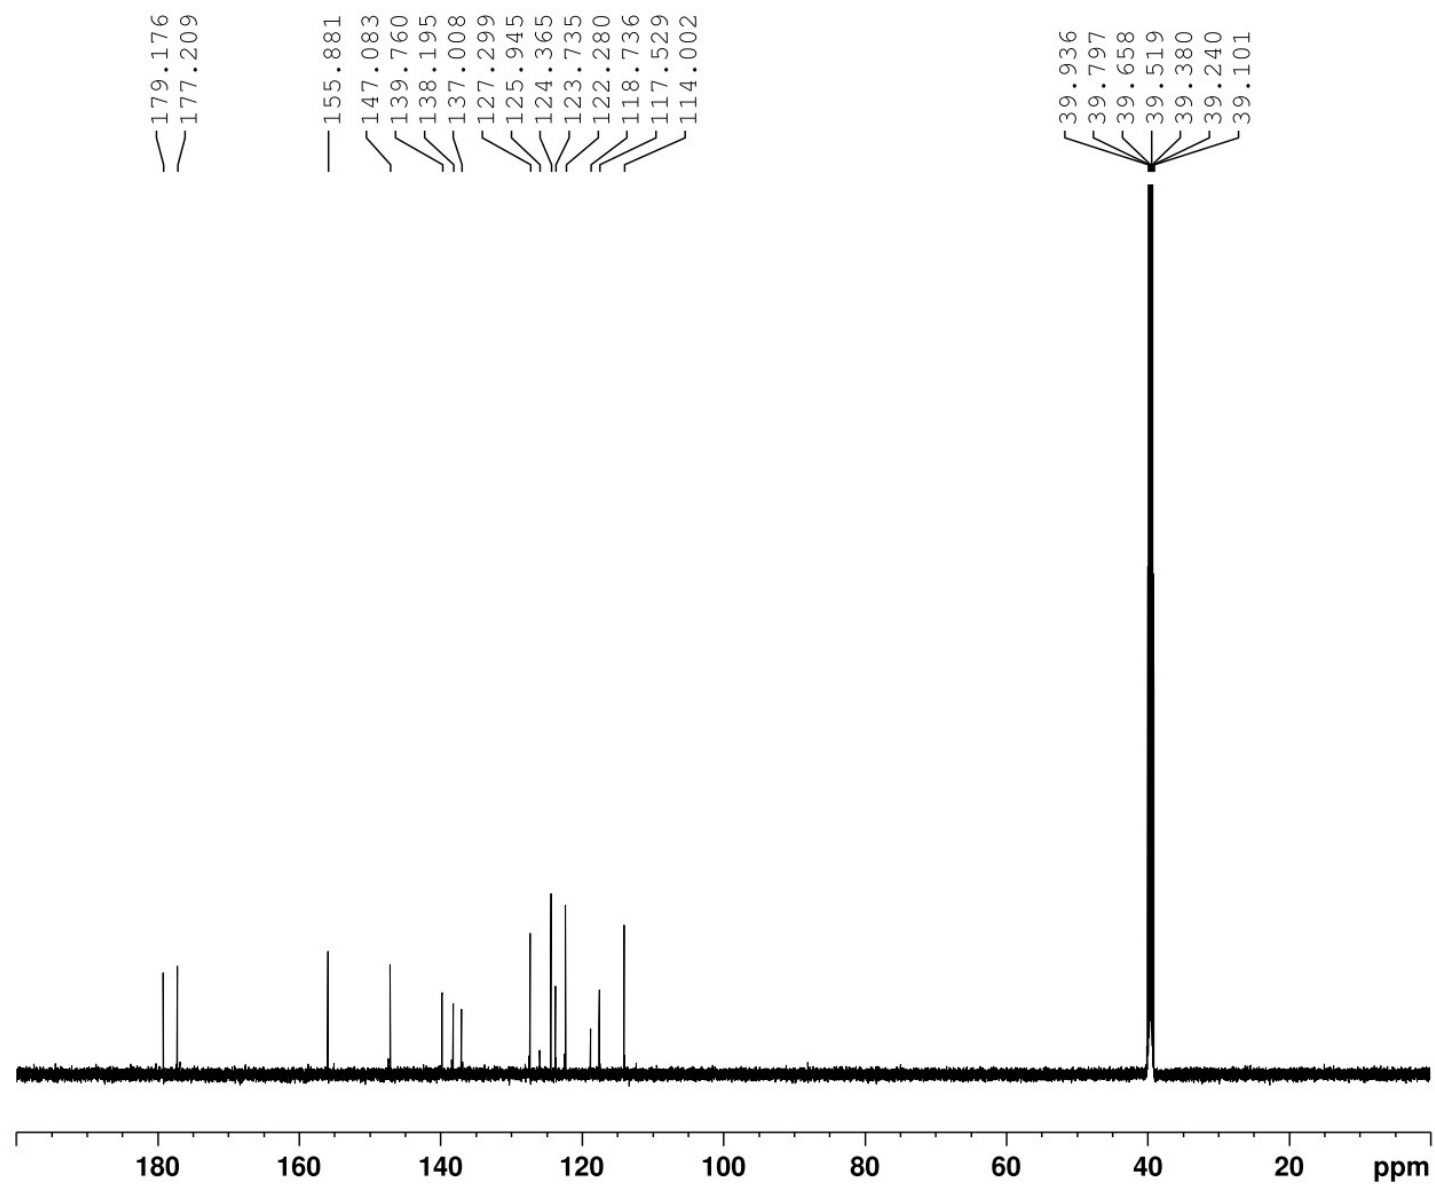

Current Data Parameters  
NAME CARBON\_20200605\_01.fid  
EXPNO 1  
PROCNO 1

F2 - Processing parameters  
SI 65536  
SF 150.8296038 MHz  
WDW no  
SSB 0  
LB 0 Hz  
GB 0  
PC 1.00

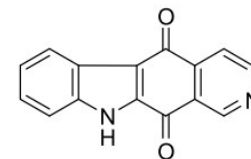

**$^{13}\text{C}$  Spectra for compound 6**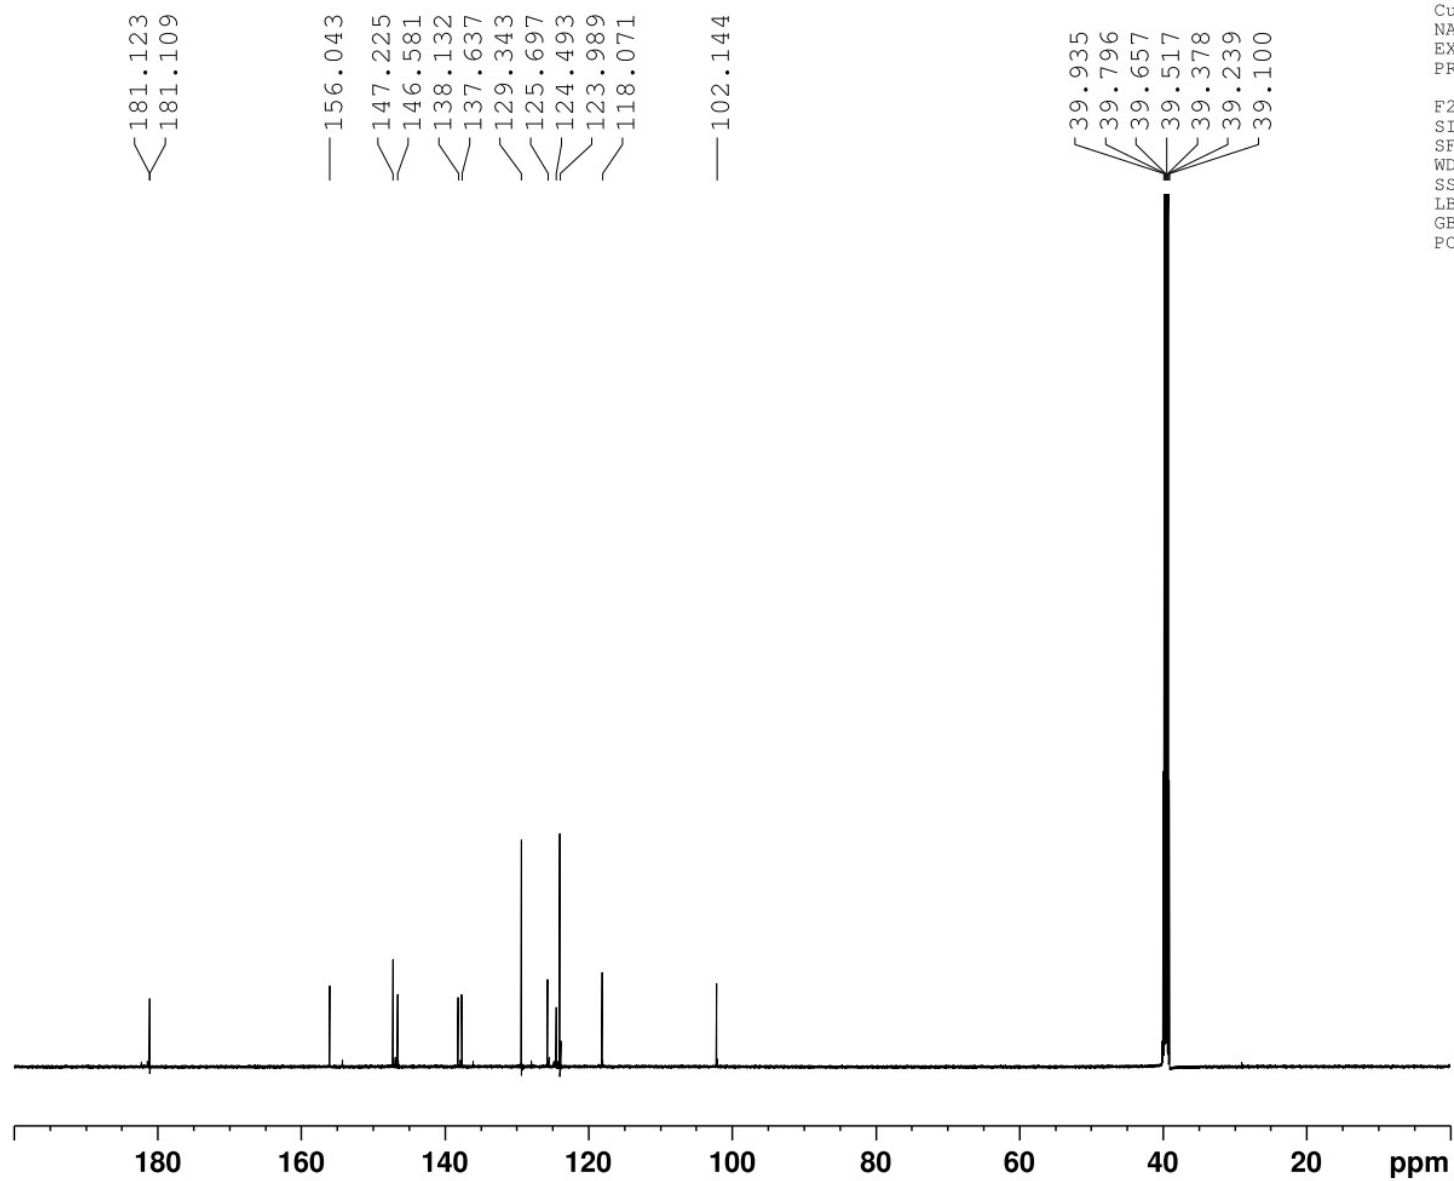

Current Data Parameters  
NAME CARBON\_20210603\_01.fid - new  
EXPNO 1  
PROCNO 1

F2 - Processing parameters  
SI 65536  
SF 150.8296036 MHz  
WDW no  
SSB 0  
LB 0 Hz  
GB 0  
PC 1.00

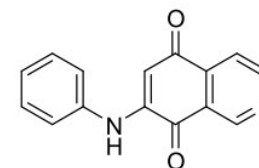

**$^{13}\text{C}$  Spectra for compound 8**

0601-DHT-quinone

Sample Name **0601-DHT-quinone**  
Date collected **2021-06-01**Pulse sequence **CARBON**  
Solvent **cdcl3**Temperature **27**  
Spectrometer **Agilent-NMR-vnmrs600**Study owner **tmu**  
Operator **tmu**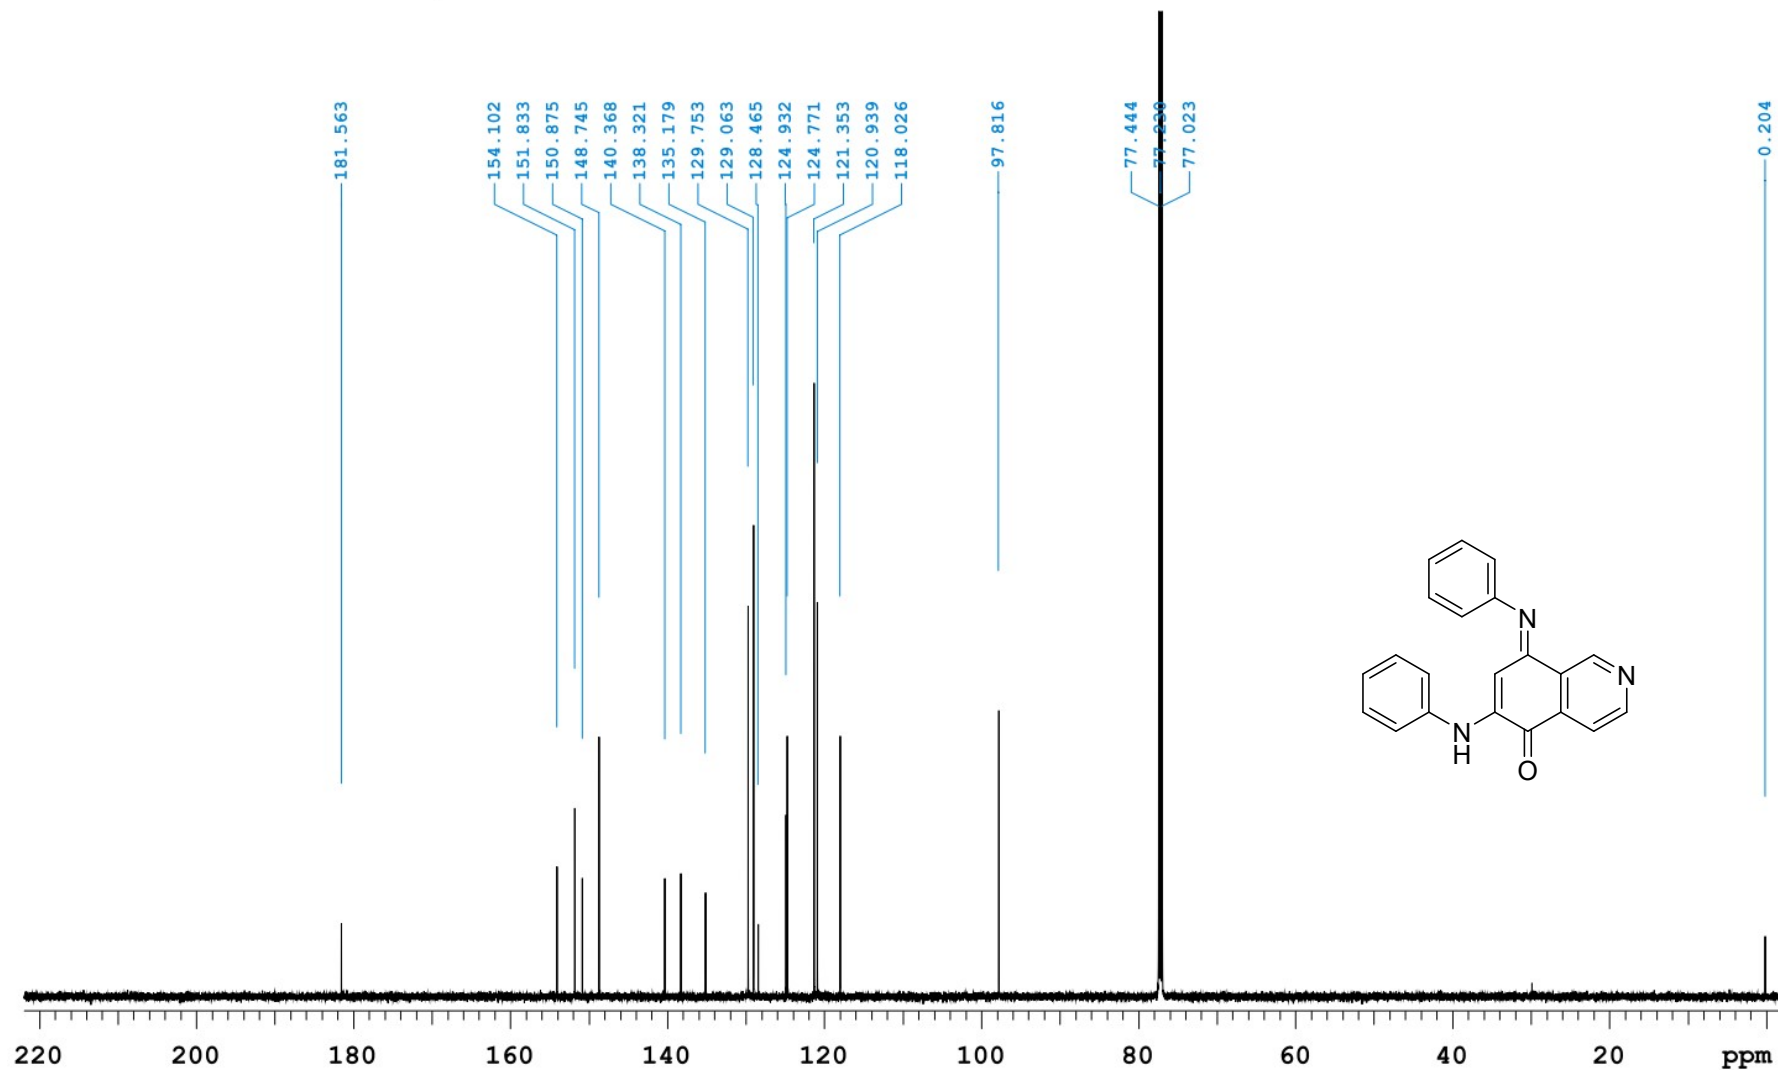

**$^{13}\text{C}$  Spectra for compound 9**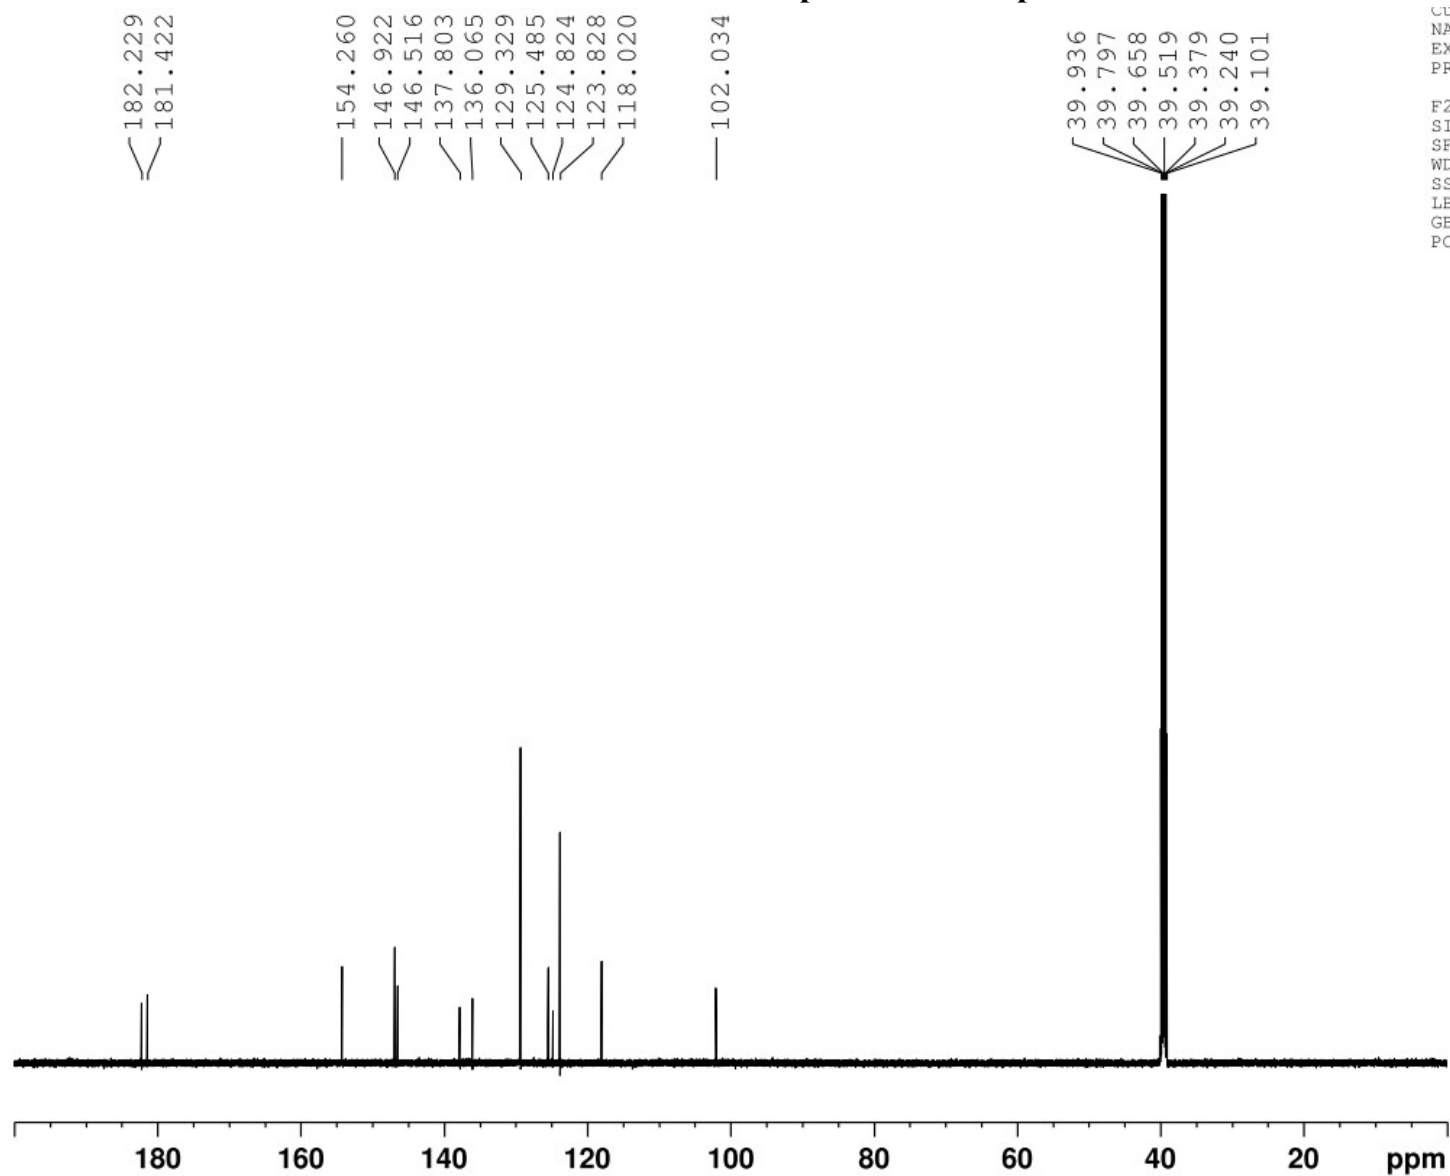

Current Data Parameters  
NAME CARBON\_20210602\_01.fid - new  
EXPNO 1  
PROCNO 1

F2 - Processing parameters  
SI 65536  
SF 150.8296037 MHz  
WDW no  
SSB 0  
LB 0 Hz  
GB 0  
PC 1.00

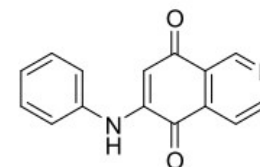

**$^{13}\text{C}$  Spectra for compound 13**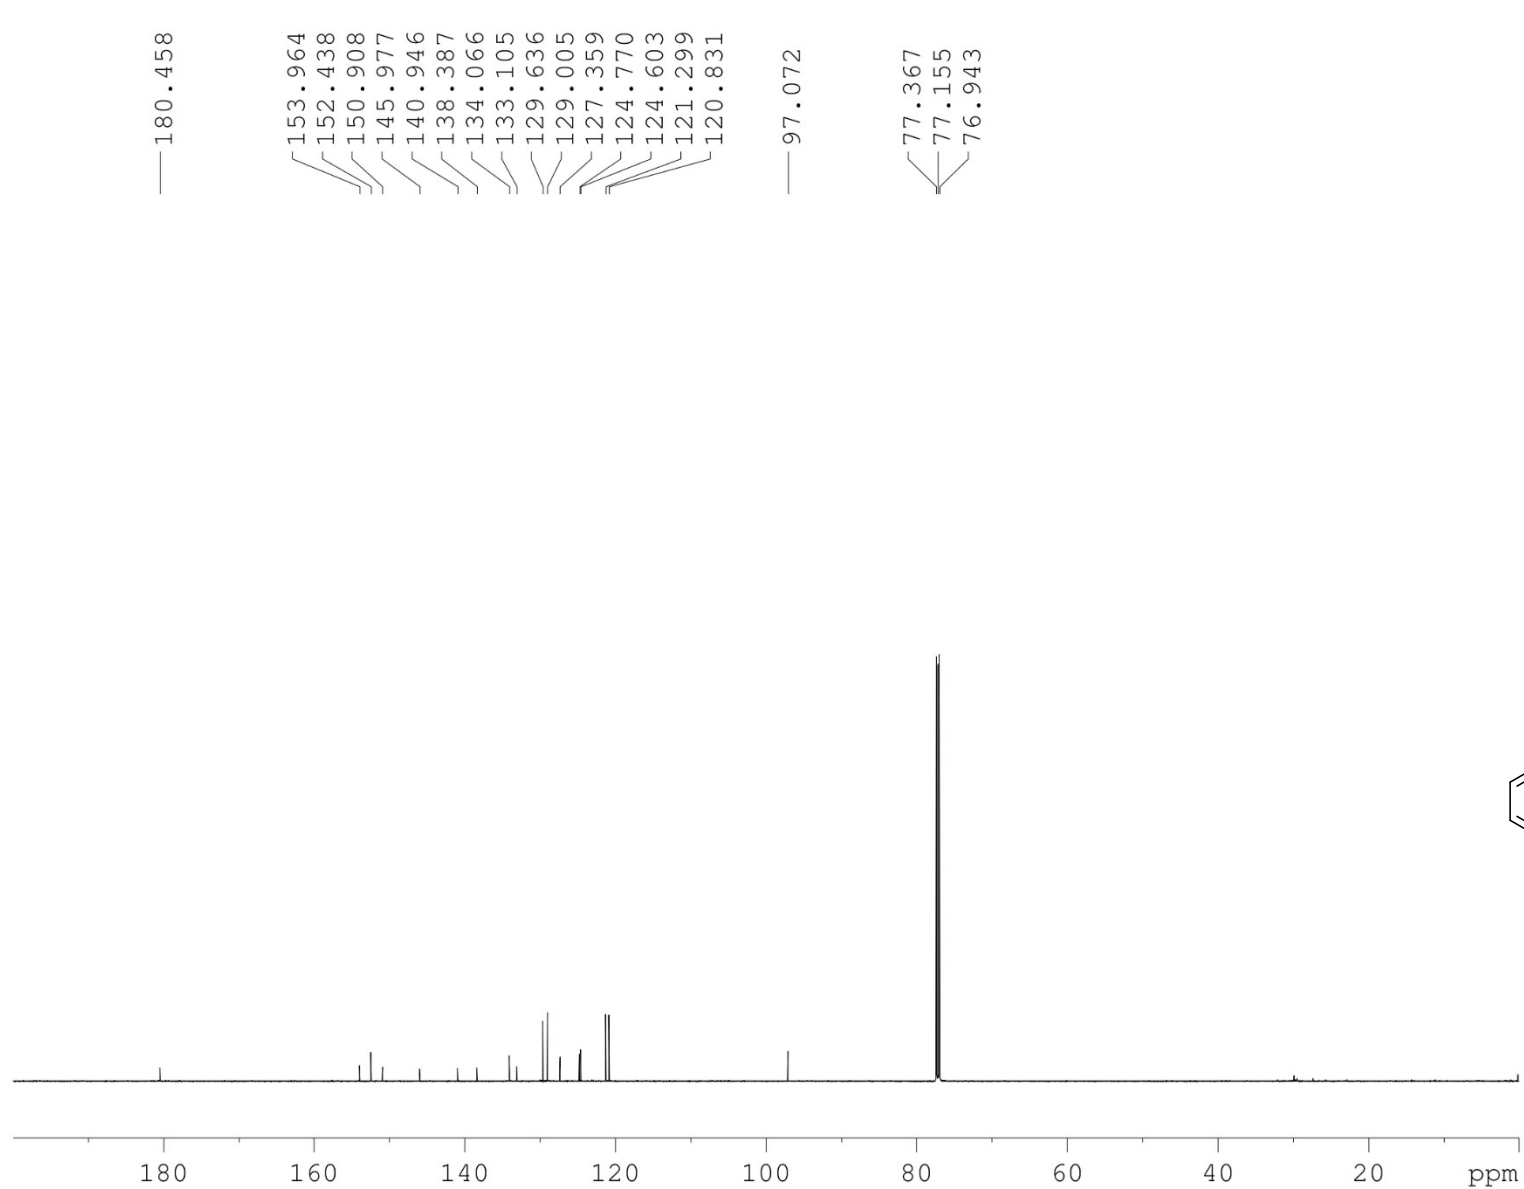

Current Data Parameters  
NAME 0908-DHT-05485-C-600 NMR  
EXPNO 2  
PROCNO 1  
F2 - Processing parameters  
SI 65536  
SF 150.8287899 MHz  
WDW no  
SSB 0  
LB 0 Hz  
GB 0  
PC 1.00

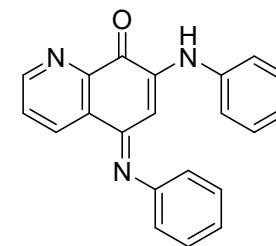

**$^{13}\text{C}$  Spectra for compound 14**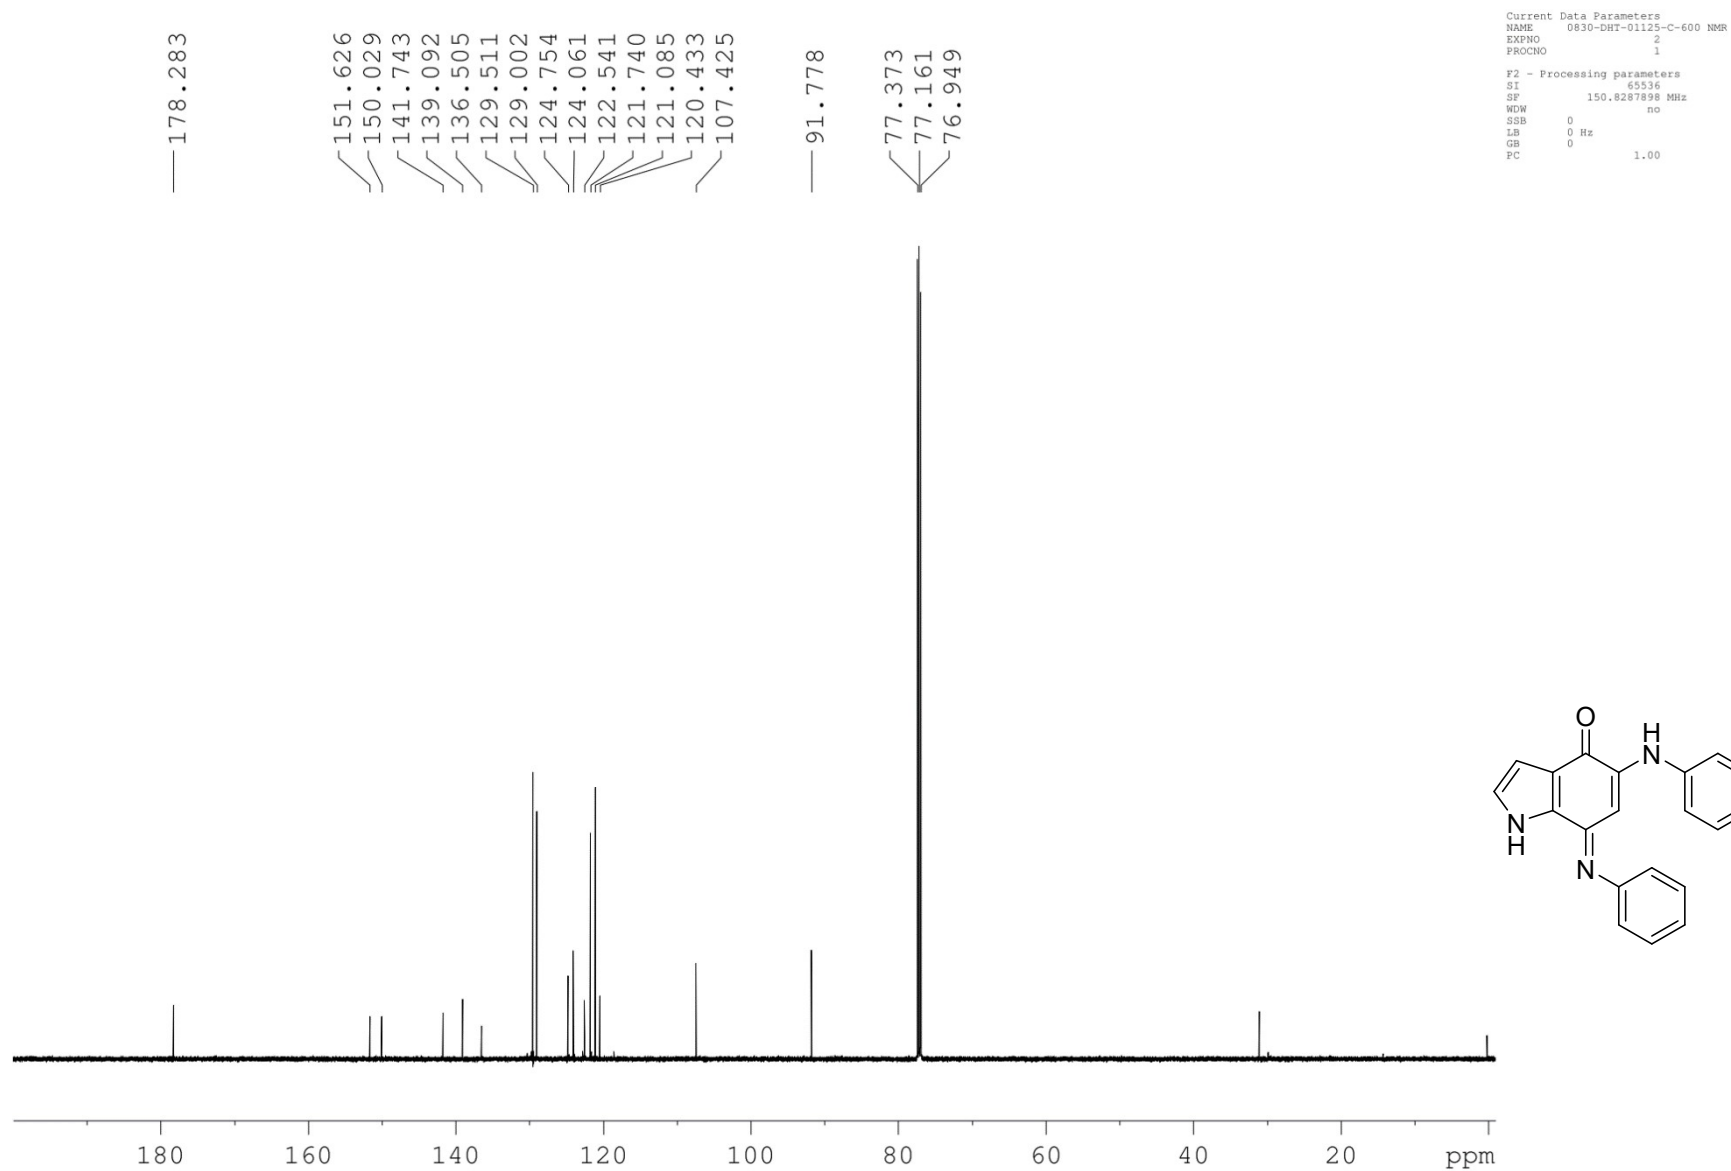

**$^{13}\text{C}$  Spectra for compound 15**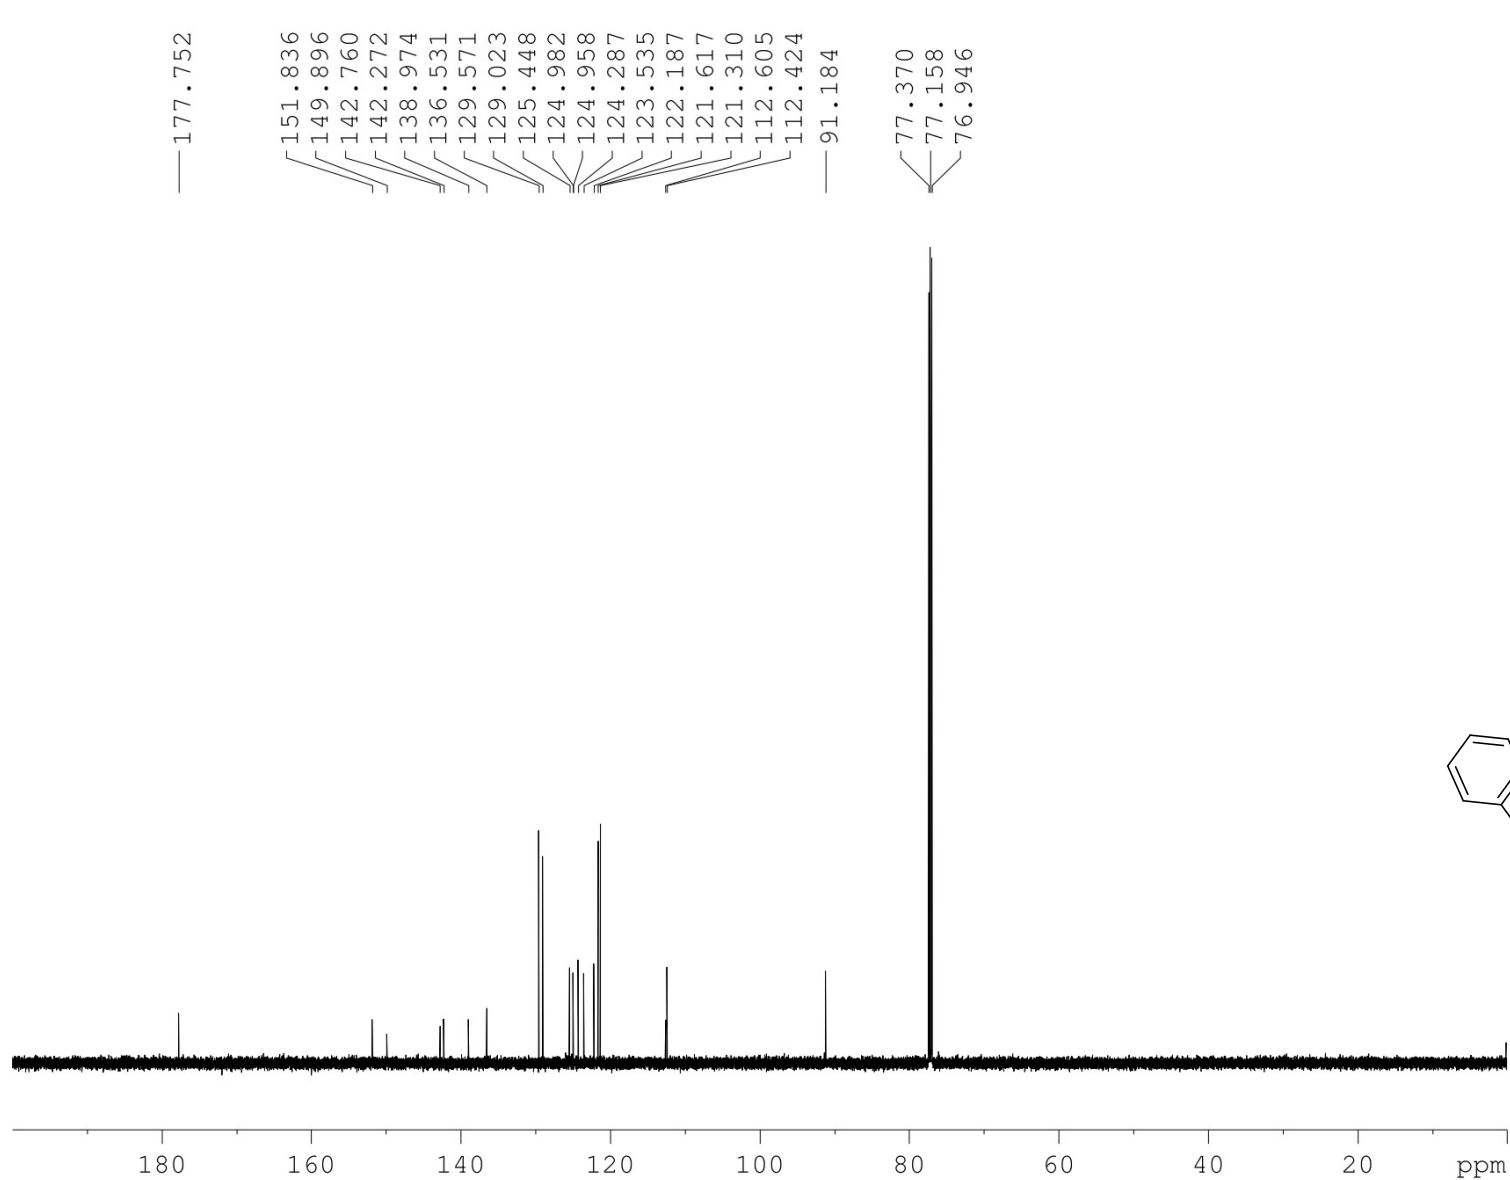



## HMBC Spectra for compound 8

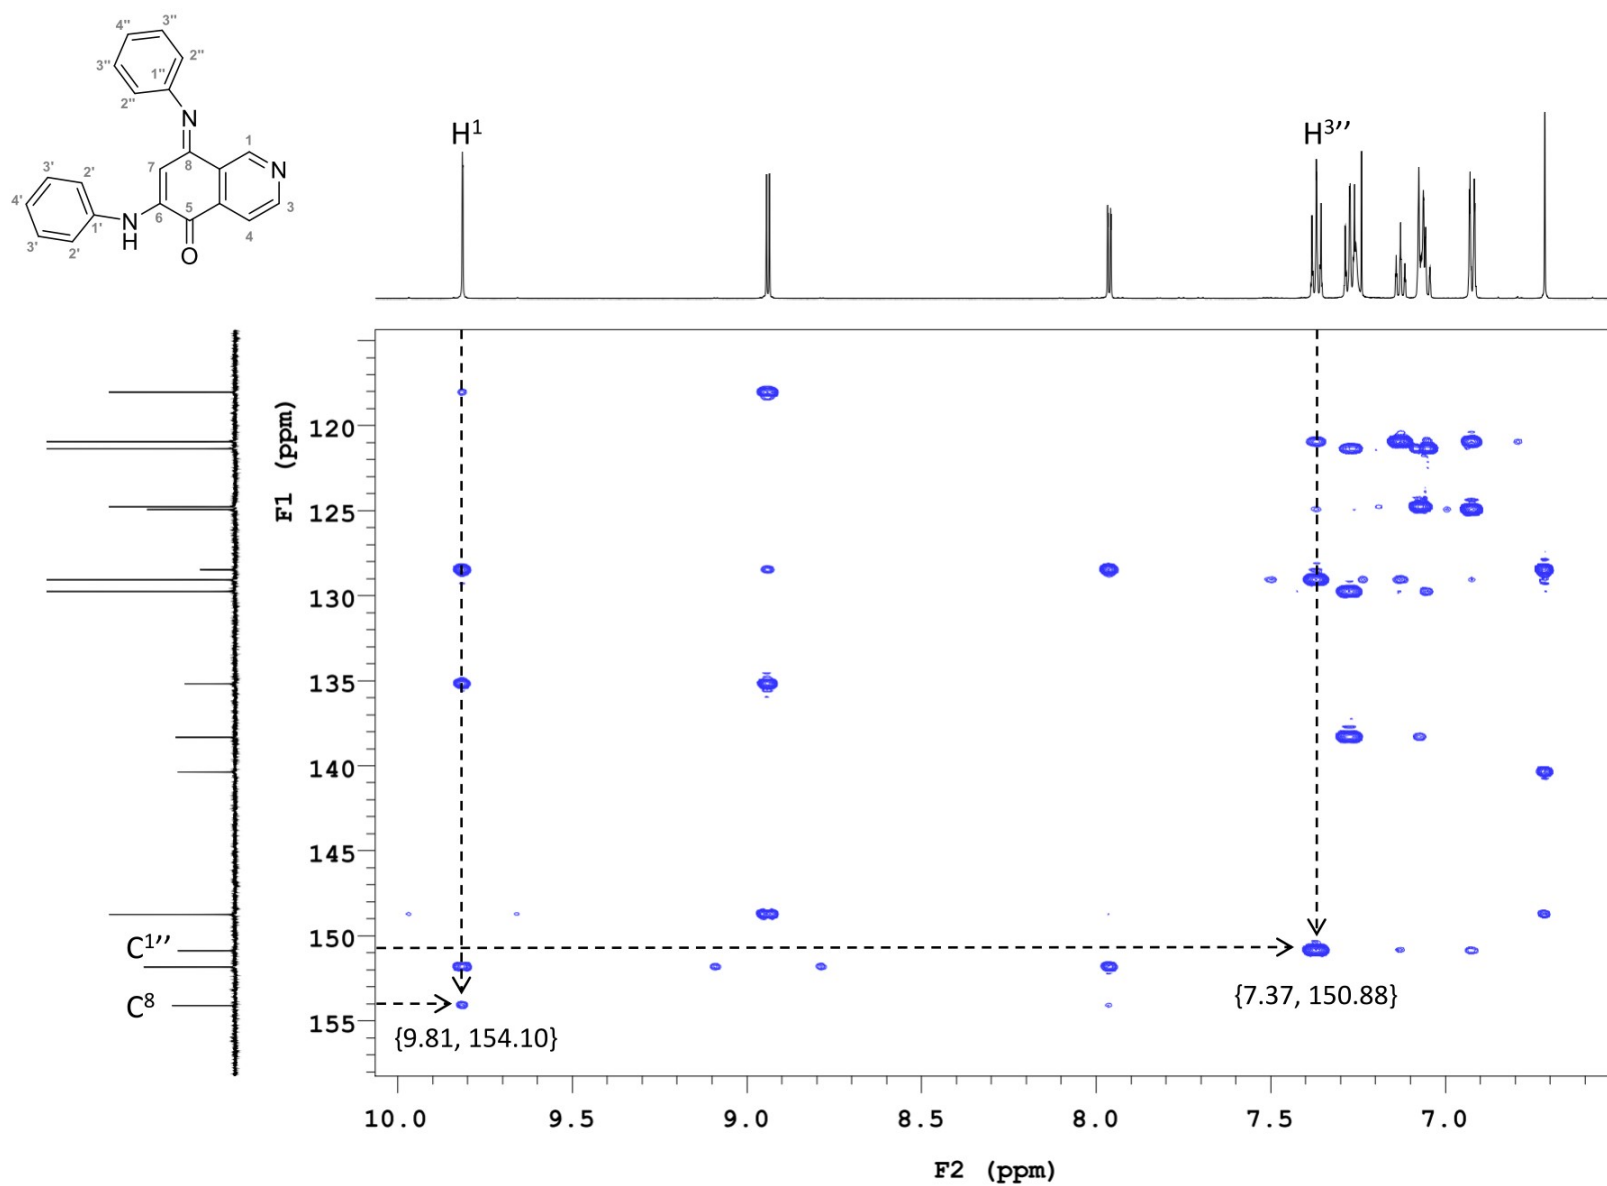

## HMBC Spectra for compound 8

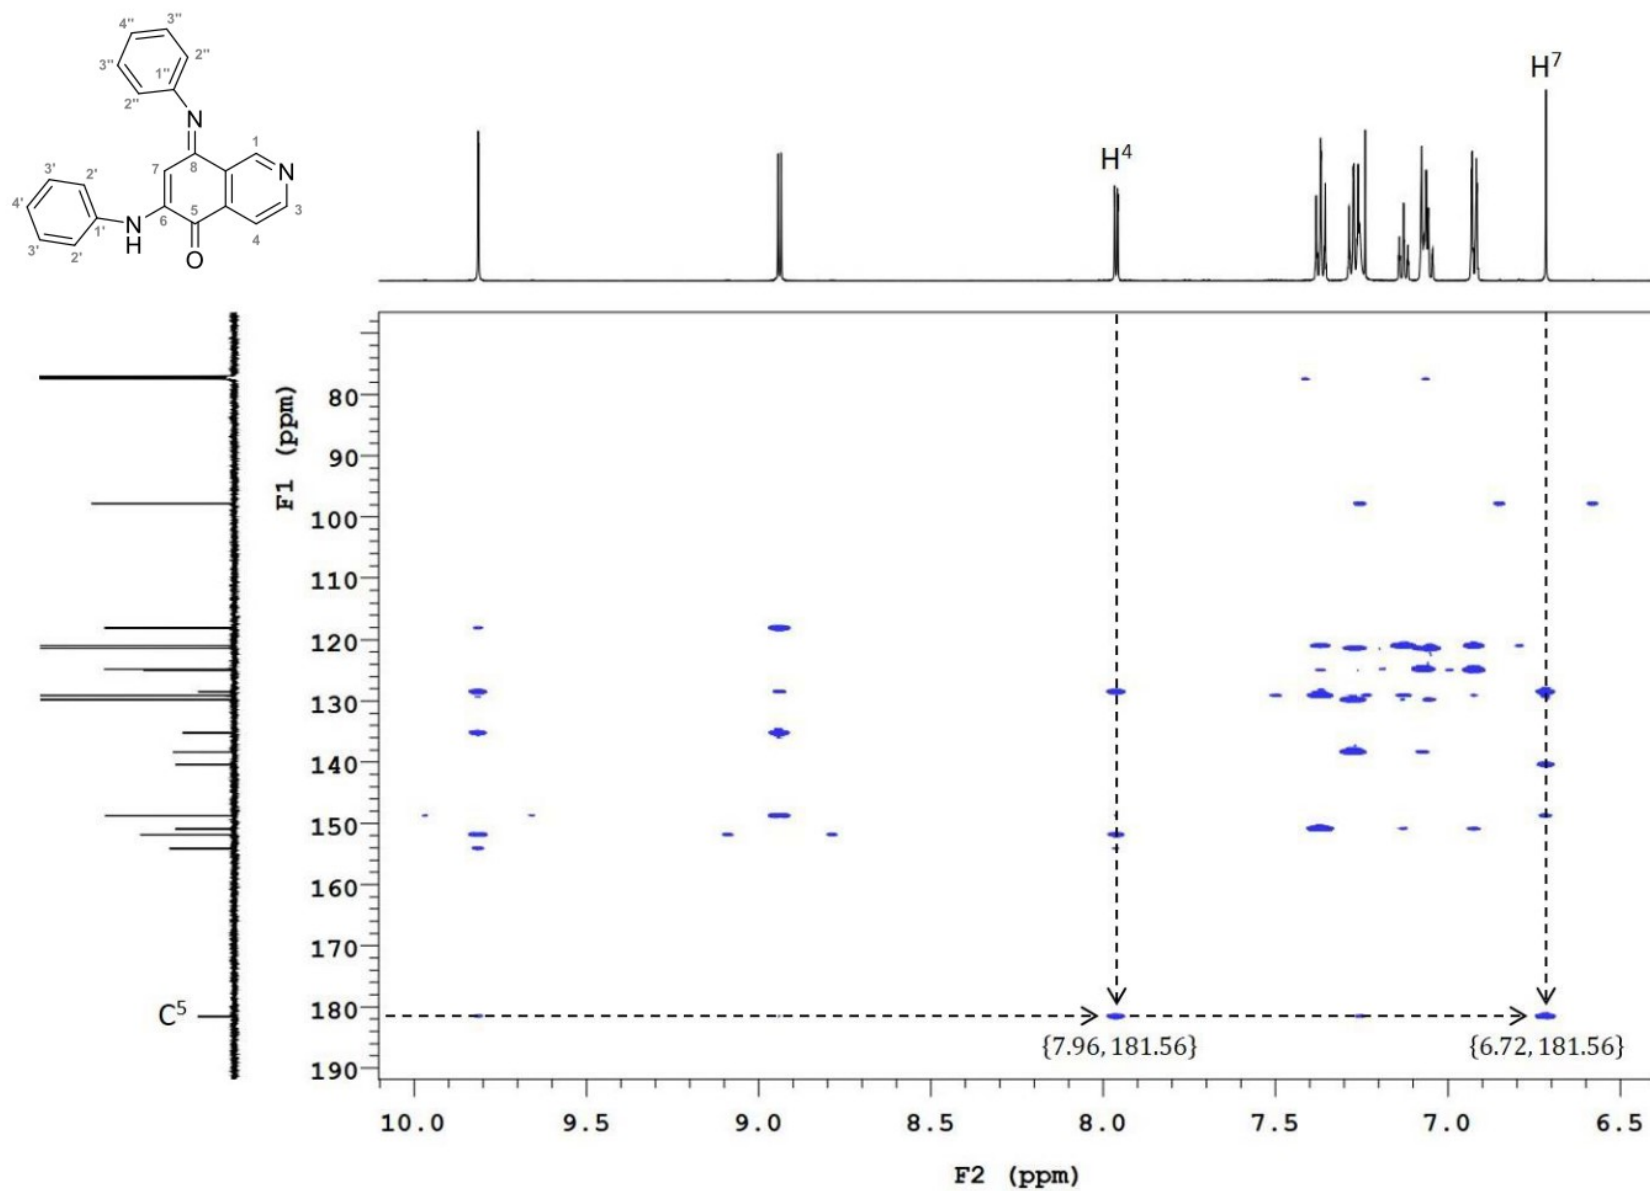

## NOESY Spectra for compound 8

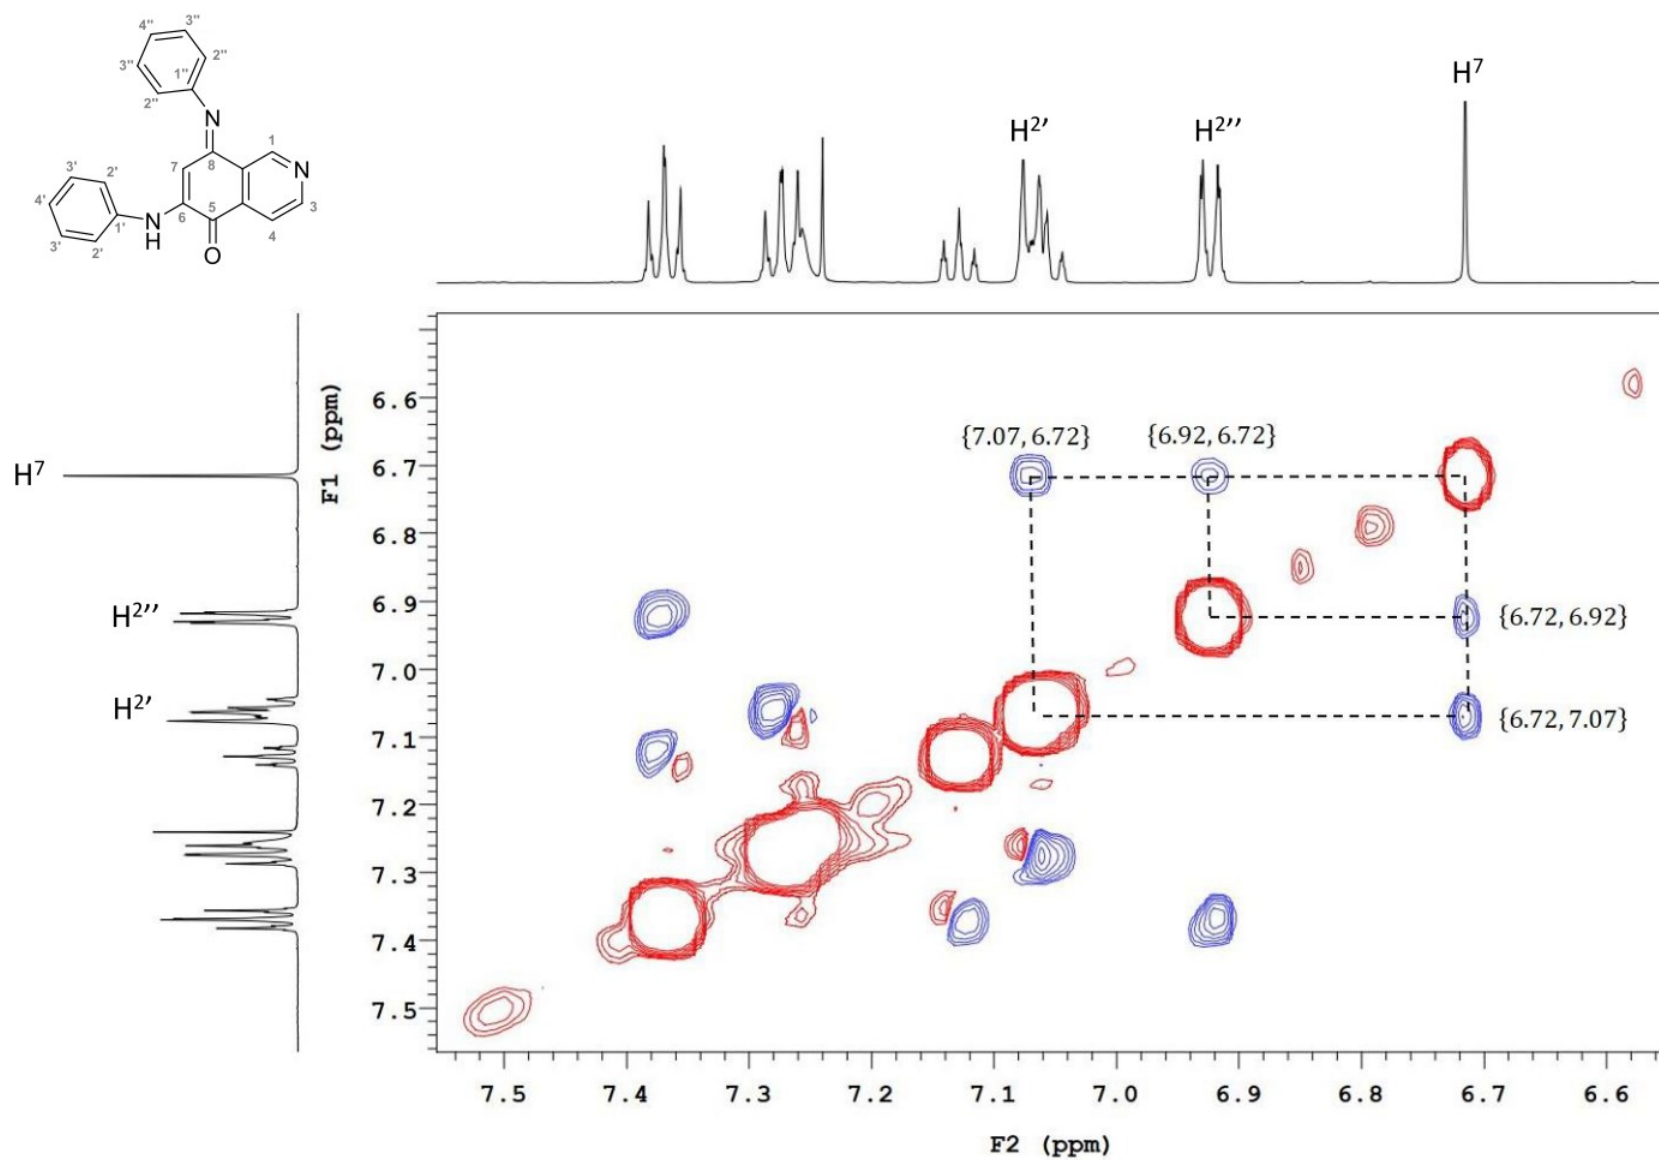

Supplement: d3ra06600b1.pdf [file d3ra06600b1.pdf]
